# Supplementary material for: Insights into copper sensing and tolerance in Pneumocystis species
Source: Front Microbiol. 2024 May 15;15:1383737. doi: 10.3389/fmicb.2024.1383737 (PMC11133566; doi:10.3389/fmicb.2024.1383737)
Supplement: SUPPLEMENTARY FILE S1 — Proteins identified by proteomics after the Cu-IMAC enrichment. [file Table_1.XLSX]

## Sheet: Sheet1
Molecular weight fraction	Source	Description	Accession	Gene Symbol
Heavy	Host uninfected	Angiotensin-converting enzyme [OS=Mus musculus]	P09470	Ace
Heavy	Host uninfected	Hemoglobin subunit alpha [OS=Mus musculus]	P01942	Hba-a1; Hba-a2
Heavy	Host uninfected	Hemoglobin subunit beta-1 [OS=Mus musculus]	P02088	Hbb-b1; Beta-s; Hbb-bs; Hbb-bt
Heavy	Host uninfected	Annexin A2 [OS=Mus musculus]	P07356	Anxa2
Heavy	Host uninfected	Carbonyl reductase [NADPH] 2 [OS=Mus musculus]	P08074	Cbr2
Heavy	Host uninfected	Aldehyde dehydrogenase, mitochondrial [OS=Mus musculus]	P47738	Aldh2
Heavy	Host uninfected	Talin-1 [OS=Mus musculus]	P26039	Tln1
Heavy	Host uninfected	Carboxylesterase 1D [OS=Mus musculus]	Q8VCT4	Ces1d
Heavy	Host uninfected	Platelet glycoprotein 4 [OS=Mus musculus]	Q08857	Cd36
Heavy	Host uninfected	Serum albumin [OS=Mus musculus]	P07724	Alb
Heavy	Host uninfected	Moesin [OS=Mus musculus]	P26041	Msn
Heavy	Host uninfected	ATP synthase subunit alpha, mitochondrial [OS=Mus musculus]	Q03265	Atp5a1
Heavy	Host uninfected	Dimethylaniline monooxygenase [N-oxide-forming] 1 [OS=Mus musculus]	P50285	Fmo1
Heavy	Host uninfected	advanced glycosylation end product-specific receptor [OS=Mus musculus]	Q62151	Ager
Heavy	Host uninfected	Hemoglobin subunit beta-2 [OS=Mus musculus]	P02089	Hbb-b2
Heavy	Host uninfected	Malate dehydrogenase, mitochondrial [OS=Mus musculus]	P08249	Mdh2
Heavy	Host uninfected	tubulin beta-5 chain [OS=Mus musculus]	P99024	Tubb5
Heavy	Host uninfected	Integrin beta-1 [OS=Mus musculus]	P09055	Itgb1
Heavy	Host uninfected	ATP synthase subunit beta, mitochondrial [OS=Mus musculus]	P56480	Atp5b
Heavy	Host uninfected	Actin, cytoplasmic 1 [OS=Mus musculus]	P60710	Actb
Heavy	Host uninfected	Actin, cytoplasmic 2 [OS=Mus musculus]	P63260	Actg1
Heavy	Host uninfected	Protein disulfide-isomerase A3 [OS=Mus musculus]	P27773	Pdia3
Heavy	Host uninfected	Vinculin [OS=Mus musculus]	Q64727	Vcl
Heavy	Host uninfected	Periaxin [OS=Mus musculus]	O55103	Prx
Heavy	Host uninfected	Synaptic vesicle membrane protein VAT-1 homolog [OS=Mus musculus]	Q62465	Vat1
Heavy	Host uninfected	Spectrin alpha chain, non-erythrocytic 1 [OS=Mus musculus]	P16546	Spna2; Sptan1
Heavy	Host uninfected	Protein disulfide-isomerase [OS=Mus musculus]	P09103	P4hb
Heavy	Host uninfected	Heat shock cognate 71 kDa protein [OS=Mus musculus]	P63017	Hspa8
Heavy	Host uninfected	Cell division control protein 42 homolog [OS=Mus musculus]	P60766-2	Cdc42
Heavy	Host uninfected	Microfibril-associated glycoprotein 4 [OS=Mus musculus]	Q9D1H9-1	Mfap4
Heavy	Host uninfected	tubulin alpha-1A chain [OS=Mus musculus]	P68369	Tuba1a
Heavy	Host uninfected	radixin [OS=Mus musculus]	P26043	Rdx
Heavy	Host uninfected	Dihydropyrimidinase-related protein 2 [OS=Mus musculus]	O08553	Dpysl2
Heavy	Host uninfected	annexin A1 [OS=Mus musculus]	P10107	Anxa1
Heavy	Host uninfected	EH domain-containing protein 4 [OS=Mus musculus]	Q9EQP2	Ehd4
Heavy	Host uninfected	Ras-related protein Rap-1b [OS=Mus musculus]	Q99JI6	Rap1b
Heavy	Host uninfected	caveolae-associated protein 1 [OS=Mus musculus]	O54724	Ptrf; Cavin1
Heavy	Host uninfected	peptidyl-prolyl cis-trans isomerase A [OS=Mus musculus]	P17742	Ppia
Heavy	Host uninfected	Tubulin alpha-4A chain [OS=Mus musculus]	P68368	Tuba4a
Heavy	Host uninfected	60 kDa heat shock protein, mitochondrial [OS=Mus musculus]	P63038-1	Hspd1
Heavy	Host uninfected	guanine nucleotide-binding protein G(i) subunit alpha-2 [OS=Mus musculus]	P08752	Gnai2
Heavy	Host uninfected	78 kDa glucose-regulated protein [OS=Mus musculus]	P20029	Hspa5
Heavy	Host uninfected	Vimentin [OS=Mus musculus]	P20152	Vim
Heavy	Host uninfected	Retinal dehydrogenase 1 [OS=Mus musculus]	P24549	Aldh1a1
Heavy	Host uninfected	Guanine nucleotide-binding protein G(I)/G(S)/G(T) subunit beta-1 [OS=Mus musculus]	P62874	Gnb1
Heavy	Host uninfected	dipeptidase 1 [OS=Mus musculus]	P31428	Dpep1
Heavy	Host uninfected	Protein S100-A8 [OS=Mus musculus]	P27005	S100a8
Heavy	Host uninfected	Protein disulfide-isomerase A6 [OS=Mus musculus]	Q922R8	Pdia6
Heavy	Host uninfected	Dimethylaniline monooxygenase [N-oxide-forming] 2 [OS=Mus musculus]	Q8K2I3	Fmo2
Heavy	Host uninfected	adenylyl cyclase-associated protein 1 [OS=Mus musculus]	P40124	Cap1
Heavy	Host uninfected	Aconitate hydratase, mitochondrial [OS=Mus musculus]	Q99KI0	Aco2
Heavy	Host uninfected	actin, gamma-enteric smooth muscle [OS=Mus musculus]	P63268	Actg2
Heavy	Host uninfected	Calreticulin [OS=Mus musculus]	P14211	Calr
Heavy	Host uninfected	Tropomyosin alpha-4 chain [OS=Mus musculus]	Q6IRU2	Tpm4
Heavy	Host uninfected	Xanthine dehydrogenase/oxidase [OS=Mus musculus]	Q00519	Xdh
Heavy	Host uninfected	Transgelin-2 [OS=Mus musculus]	Q9WVA4	Tagln2
Heavy	Host uninfected	Cytochrome P450 4B1 [OS=Mus musculus]	Q64462	Cyp4b1
Heavy	Host uninfected	Sodium/potassium-transporting ATPase subunit alpha-1 [OS=Mus musculus]	Q8VDN2	Atp1a1
Heavy	Host uninfected	Aspartate aminotransferase, mitochondrial [OS=Mus musculus]	P05202	Got2
Heavy	Host uninfected	Clathrin heavy chain 1 [OS=Mus musculus]	Q68FD5	Cltc
Heavy	Host uninfected	Glutathione S-transferase Mu 1 [OS=Mus musculus]	P10649	Gstm1
Heavy	Host uninfected	Chloride intracellular channel protein 5 [OS=Mus musculus]	Q8BXK9	Clic5
Heavy	Host uninfected	Indolethylamine N-methyltransferase [OS=Mus musculus]	P40936	Inmt
Heavy	Host uninfected	Spectrin beta chain, non-erythrocytic 1 [OS=Mus musculus]	Q62261-1	Spnb2; Sptbn1
Heavy	Host uninfected	Transitional endoplasmic reticulum ATPase [OS=Mus musculus]	Q01853	Vcp
Heavy	Host uninfected	Plastin-2 [OS=Mus musculus]	Q61233	Lcp1
Heavy	Host uninfected	14-3-3 protein theta [OS=Mus musculus]	P68254-1	Ywhaq; LOC102634437; Gm11226; Ywhaq-ps3; Cdk5rap2
Heavy	Host uninfected	Peroxiredoxin-2 [OS=Mus musculus]	Q61171	Prdx2
Heavy	Host uninfected	Isoform 2 of Tropomyosin alpha-3 chain [OS=Mus musculus]	P21107-2	Tpm3
Heavy	Host uninfected	guanine nucleotide-binding protein subunit alpha-11 [OS=Mus musculus]	P21278	Gna11
Heavy	Host uninfected	Chitinase-like protein 3 [OS=Mus musculus]	O35744	Chi3l3; Chil3
Heavy	Host uninfected	Laminin subunit beta-1 [OS=Mus musculus]	P02469	Lamb1
Heavy	Host uninfected	Myosin-9 [OS=Mus musculus]	Q8VDD5	Myh9
Heavy	Host uninfected	annexin A5 [OS=Mus musculus]	P48036	Anxa5
Heavy	Host uninfected	14-3-3 protein zeta/delta [OS=Mus musculus]	P63101	Ywhaz
Heavy	Host uninfected	Trifunctional enzyme subunit alpha, mitochondrial [OS=Mus musculus]	Q8BMS1	Hadha
Heavy	Host uninfected	Ezrin [OS=Mus musculus]	P26040	Ezr
Heavy	Host uninfected	2-oxoglutarate dehydrogenase, mitochondrial [OS=Mus musculus]	Q60597	Ogdh
Heavy	Host uninfected	ADP/ATP translocase 1 [OS=Mus musculus]	P48962	Slc25a4
Heavy	Host uninfected	Extended synaptotagmin-1 [OS=Mus musculus]	Q3U7R1	Esyt1
Heavy	Host uninfected	Guanine nucleotide-binding protein G(Q) subunit alpha [OS=Mus musculus]	P21279	Gnaq
Heavy	Host uninfected	Lymphocyte antigen 6C1 [OS=Mus musculus]	P0CW02	Ly6c1
Heavy	Host uninfected	Endothelial cell-selective adhesion molecule [OS=Mus musculus]	Q925F2	Esam
Heavy	Host uninfected	Caveolin-1 [OS=Mus musculus]	P49817	Cav1
Heavy	Host uninfected	Transketolase [OS=Mus musculus]	P40142	Tkt
Heavy	Host uninfected	Acetyl-CoA acetyltransferase, mitochondrial [OS=Mus musculus]	Q8QZT1	Acat1
Heavy	Host uninfected	Tropomyosin alpha-1 chain [OS=Mus musculus]	P58771-1	Tpm1
Heavy	Host uninfected	Glutathione S-transferase Mu 2 [OS=Mus musculus]	P15626	Gstm2
Heavy	Host uninfected	serine/threonine-protein phosphatase 2A 65 kDa regulatory subunit A alpha isoform [OS=Mus musculus]	Q76MZ3	Ppp2r1a
Heavy	Host uninfected	Selenium-binding protein 1 [OS=Mus musculus]	P17563	Selenbp1
Heavy	Host uninfected	ADP/ATP translocase 2 [OS=Mus musculus]	P51881	Slc25a5
Heavy	Host uninfected	Myosin light polypeptide 6 [OS=Mus musculus]	Q60605	Myl6
Heavy	Host uninfected	Endoplasmin [OS=Mus musculus]	P08113	Hsp90b1
Heavy	Host uninfected	NADH-cytochrome b5 reductase 3 [OS=Mus musculus]	Q9DCN2	Cyb5r3
Heavy	Host uninfected	Intercellular adhesion molecule 1 [OS=Mus musculus]	P13597-1	Icam1
Heavy	Host uninfected	Elongation factor 2 [OS=Mus musculus]	P58252	Eef2
Heavy	Host uninfected	Band 3 anion transport protein [OS=Mus musculus]	P04919	Slc4a1
Heavy	Host uninfected	Peroxiredoxin-5, mitochondrial [OS=Mus musculus]	P99029	Prdx5
Heavy	Host uninfected	Filamin-A [OS=Mus musculus]	Q8BTM8	Flna
Heavy	Host uninfected	Heat shock 70 kDa protein 12B [OS=Mus musculus]	Q9CZJ2	Hspa12b
Heavy	Host uninfected	Alpha-actinin-1 [OS=Mus musculus]	Q7TPR4	Actn1
Heavy	Host uninfected	Myosin regulatory light chain 2, skeletal muscle isoform [OS=Mus musculus]	P97457	Mylpf
Heavy	Host uninfected	Mimecan [OS=Mus musculus]	Q62000	Ogn
Heavy	Host uninfected	3-hydroxyacyl-CoA dehydrogenase type-2 [OS=Mus musculus]	O08756	Hsd17b10
Heavy	Host uninfected	Chloride intracellular channel protein 4 [OS=Mus musculus]	Q9QYB1	Clic4
Heavy	Host uninfected	Serine protease inhibitor A3K [OS=Mus musculus]	P07759	Serpina3k
Heavy	Host uninfected	Cytochrome P450 2F2 [OS=Mus musculus]	P33267	Cyp2f2
Heavy	Host uninfected	annexin A6 [OS=Mus musculus]	P14824	Anxa6
Heavy	Host uninfected	caveolae-associated protein 2 [OS=Mus musculus]	Q63918	Sdpr; Cavin2
Heavy	Host uninfected	catalase [OS=Mus musculus]	P24270	Cat
Heavy	Host uninfected	prostacyclin synthase [OS=Mus musculus]	O35074	Ptgis
Heavy	Host uninfected	profilin-1 [OS=Mus musculus]	P62962	Pfn1
Heavy	Host uninfected	Ras suppressor protein 1 [OS=Mus musculus]	Q01730	Rsu1
Heavy	Host uninfected	EH domain-containing protein 2 [OS=Mus musculus]	Q8BH64	Ehd2
Heavy	Host uninfected	Lamin-B1 [OS=Mus musculus]	P14733	Lmnb1
Heavy	Host uninfected	Integrin alpha-3 [OS=Mus musculus]	Q62470	Itga3
Heavy	Host uninfected	AP-2 complex subunit beta [OS=Mus musculus]	Q9DBG3	Ap2b1
Heavy	Host uninfected	Alpha-actinin-4 [OS=Mus musculus]	P57780	Actn4
Heavy	Host uninfected	Tropomyosin beta chain [OS=Mus musculus]	P58774	Tpm2
Heavy	Host uninfected	Heat shock protein beta-1 [OS=Mus musculus]	P14602	Hspb1
Heavy	Host uninfected	Cofilin-1 [OS=Mus musculus]	P18760	Cfl1
Heavy	Host uninfected	Basal cell adhesion molecule [OS=Mus musculus]	Q9R069	Bcam
Heavy	Host uninfected	neutrophilic granule protein [OS=Mus musculus]	O08692	Ngp
Heavy	Host uninfected	Prelamin-A/C [OS=Mus musculus]	P48678-1	Lmna
Heavy	Host uninfected	fructose-bisphosphate aldolase A [OS=Mus musculus]	P05064	Aldoa
Heavy	Host uninfected	Apolipoprotein A-I [OS=Mus musculus]	Q00623	Apoa1
Heavy	Host uninfected	L-lactate dehydrogenase A chain [OS=Mus musculus]	P06151	Ldha
Heavy	Host uninfected	Integrin alpha-1 [OS=Mus musculus]	Q3V3R4	Itga1
Heavy	Host uninfected	AP-1 complex subunit beta-1 [OS=Mus musculus]	O35643	Ap1b1
Heavy	Host uninfected	Transforming protein RhoA [OS=Mus musculus]	Q9QUI0	Rhoa
Heavy	Host uninfected	Histone H2A type 3 [OS=Mus musculus]	Q8BFU2	Hist3h2a
Heavy	Host uninfected	10 kDa heat shock protein, mitochondrial [OS=Mus musculus]	Q64433	Hspe1
Heavy	Host uninfected	lysozyme c-2 [OS=Mus musculus]	P08905	Lyz2
Heavy	Host uninfected	myosin light chain 3 [OS=Mus musculus]	P09542	Myl3
Heavy	Host uninfected	Hypoxia up-regulated protein 1 [OS=Mus musculus]	Q9JKR6	Hyou1
Heavy	Host uninfected	Succinyl-CoA:3-ketoacid coenzyme A transferase 1, mitochondrial [OS=Mus musculus]	Q9D0K2	Oxct1
Heavy	Host uninfected	Glutamate dehydrogenase 1, mitochondrial [OS=Mus musculus]	P26443	Glud1
Heavy	Host uninfected	annexin A3 [OS=Mus musculus]	O35639	Anxa3
Heavy	Host uninfected	ras-related protein Rab-7a [OS=Mus musculus]	P51150	Rab7
Heavy	Host uninfected	Guanine nucleotide-binding protein G(I)/G(S)/G(T) subunit beta-2 [OS=Mus musculus]	P62880	Gnb2
Heavy	Host uninfected	Methylmalonate-semialdehyde dehydrogenase [acylating], mitochondrial [OS=Mus musculus]	Q9EQ20	Aldh6a1
Heavy	Host uninfected	Lumican [OS=Mus musculus]	P51885	Lum
Heavy	Host uninfected	Isocitrate dehydrogenase [NADP], mitochondrial [OS=Mus musculus]	P54071	Idh2
Heavy	Host uninfected	Dipeptidyl peptidase 4 [OS=Mus musculus]	P28843	Dpp4
Heavy	Host uninfected	Cytoplasmic dynein 1 heavy chain 1 [OS=Mus musculus]	Q9JHU4	Dync1h1
Heavy	Host uninfected	Calnexin [OS=Mus musculus]	P35564	Canx
Heavy	Host uninfected	Thrombomodulin [OS=Mus musculus]	P15306	Thbd
Heavy	Host uninfected	citrate synthase, mitochondrial [OS=Mus musculus]	Q9CZU6	Cs
Heavy	Host uninfected	Stress-70 protein, mitochondrial [OS=Mus musculus]	P38647	Hspa9
Heavy	Host uninfected	Cytochrome c oxidase subunit 5A, mitochondrial [OS=Mus musculus]	P12787	Cox5a
Heavy	Host uninfected	Na(+)/H(+) exchange regulatory cofactor NHE-RF2 [OS=Mus musculus]	Q9JHL1	Slc9a3r2
Heavy	Host uninfected	F-actin-capping protein subunit alpha-2 [OS=Mus musculus]	P47754	Capza2
Heavy	Host uninfected	Carbonic anhydrase 4 [OS=Mus musculus]	Q64444	Car4
Heavy	Host uninfected	annexin A4 [OS=Mus musculus]	P97429	Anxa4
Heavy	Host uninfected	Corticosteroid 11-beta-dehydrogenase isozyme 1 [OS=Mus musculus]	P50172	Hsd11b1
Heavy	Host uninfected	Electron transfer flavoprotein subunit alpha, mitochondrial [OS=Mus musculus]	Q99LC5	Etfa
Heavy	Host uninfected	tropomodulin-3 [OS=Mus musculus]	Q9JHJ0	Tmod3
Heavy	Host uninfected	EH domain-containing protein 1 [OS=Mus musculus]	Q9WVK4	Ehd1
Heavy	Host uninfected	Fermitin family homolog 2 [OS=Mus musculus]	Q8CIB5	Fermt2
Heavy	Host uninfected	alpha-enolase [OS=Mus musculus]	P17182	Eno1; Gm5506; Eno1b
Heavy	Host uninfected	ATP synthase subunit O, mitochondrial [OS=Mus musculus]	Q9DB20	Atp5o; LOC100047429; LOC102641678
Heavy	Host uninfected	serine/threonine-protein phosphatase PP1-gamma catalytic subunit [OS=Mus musculus]	P63087	Ppp1cc; Gm5601
Heavy	Host uninfected	Carbonic anhydrase 2 [OS=Mus musculus]	P00920	Car2
Heavy	Host uninfected	Heat shock protein HSP 90-beta [OS=Mus musculus]	P11499	Hsp90ab1
Heavy	Host uninfected	mitochondrial fission 1 protein [OS=Mus musculus]	Q9CQ92	Fis1
Heavy	Host uninfected	Dihydrolipoyl dehydrogenase, mitochondrial [OS=Mus musculus]	O08749	Dld
Heavy	Host uninfected	glucose-6-phosphate isomerase [OS=Mus musculus]	P06745	Gpi1
Heavy	Host uninfected	Rab GDP dissociation inhibitor alpha [OS=Mus musculus]	P50396	Gdi1
Heavy	Host uninfected	Actin-related protein 2/3 complex subunit 2 [OS=Mus musculus]	Q9CVB6	Arpc2
Heavy	Host uninfected	Platelet endothelial cell adhesion molecule [OS=Mus musculus]	Q08481-1	Pecam1
Heavy	Host uninfected	Ras-related protein Rab-2A [OS=Mus musculus]	P53994	Rab2a
Heavy	Host uninfected	Junction plakoglobin [OS=Mus musculus]	Q02257	Jup
Heavy	Host uninfected	Catenin alpha-1 [OS=Mus musculus]	P26231	Ctnna1
Heavy	Host uninfected	Laminin subunit alpha-4 [OS=Mus musculus]	P97927	Lama4
Heavy	Host uninfected	Rab GDP dissociation inhibitor beta [OS=Mus musculus]	Q61598	Gdi2
Heavy	Host uninfected	55 kDa erythrocyte membrane protein [OS=Mus musculus]	P70290	Mpp1
Heavy	Host uninfected	Superoxide dismutase [Cu-Zn] [OS=Mus musculus]	P08228	Sod1
Heavy	Host uninfected	3-ketoacyl-CoA thiolase, mitochondrial [OS=Mus musculus]	Q8BWT1	Acaa2
Heavy	Host uninfected	Ferritin light chain 1 [OS=Mus musculus]	P29391	Ftl1
Heavy	Host uninfected	Ras-related protein Rab-11B [OS=Mus musculus]	P46638	Rab11b
Heavy	Host uninfected	Calcium-binding mitochondrial carrier protein Aralar1 [OS=Mus musculus]	Q8BH59	Slc25a12
Heavy	Host uninfected	peroxisomal multifunctional enzyme type 2 [OS=Mus musculus]	P51660	Hsd17b4
Heavy	Host uninfected	Heterogeneous nuclear ribonucleoprotein F [OS=Mus musculus]	Q9Z2X1-1	Hnrnpf
Heavy	Host uninfected	Tight junction protein ZO-1 [OS=Mus musculus]	P39447	Tjp1
Heavy	Host uninfected	glyceraldehyde-3-phosphate dehydrogenase [OS=Mus musculus]	P16858	Gapdh; Gm20899; LOC100042025; Gapdh-ps15; Gm12033
Heavy	Host uninfected	Unconventional myosin-Ic [OS=Mus musculus]	Q9WTI7-1	Myo1c
Heavy	Host uninfected	Retinoic acid-induced protein 3 [OS=Mus musculus]	Q8BHL4	Gprc5a
Heavy	Host uninfected	Isocitrate dehydrogenase [NAD] subunit alpha, mitochondrial [OS=Mus musculus]	Q9D6R2	Idh3a
Heavy	Host uninfected	Beta-2-glycoprotein 1 [OS=Mus musculus]	Q01339	Apoh
Heavy	Host uninfected	Acyl-coenzyme A thioesterase 2, mitochondrial [OS=Mus musculus]	Q9QYR9	Acot2
Heavy	Host uninfected	Glutamyl aminopeptidase [OS=Mus musculus]	P16406	Enpep
Heavy	Host uninfected	Peroxiredoxin-6 [OS=Mus musculus]	O08709	Prdx6
Heavy	Host uninfected	elongation factor 1-gamma [OS=Mus musculus]	Q9D8N0	Eef1g
Heavy	Host uninfected	Septin-7 [OS=Mus musculus]	O55131	2024-09-07
Heavy	Host uninfected	CD166 antigen [OS=Mus musculus]	Q61490	Alcam
Heavy	Host uninfected	Sarcoplasmic/endoplasmic reticulum calcium ATPase 2 [OS=Mus musculus]	O55143-1	Atp2a2
Heavy	Host uninfected	Atlastin-3 [OS=Mus musculus]	Q91YH5-1	Atl3
Heavy	Host uninfected	Alpha-actinin-2 [OS=Mus musculus]	Q9JI91	Actn2
Heavy	Host uninfected	Ubiquitin-60S ribosomal protein L40 [OS=Mus musculus]	P62984	Uba52; Gm11808
Heavy	Host uninfected	rho GDP-dissociation inhibitor 1 [OS=Mus musculus]	Q99PT1	Arhgdia
Heavy	Host uninfected	Lactotransferrin [OS=Mus musculus]	P08071	Ltf
Heavy	Host uninfected	Heterogeneous nuclear ribonucleoprotein K [OS=Mus musculus]	P61979	Hnrnpk
Heavy	Host uninfected	Sarcoplasmic/endoplasmic reticulum calcium ATPase 1 [OS=Mus musculus]	Q8R429	Atp2a1
Heavy	Host uninfected	Ras-related protein R-Ras [OS=Mus musculus]	P10833	Rras
Heavy	Host uninfected	Pyruvate kinase PKM [OS=Mus musculus]	P52480	Pkm
Heavy	Host uninfected	Cytochrome P450 2B10 [OS=Mus musculus]	P12791	Cyp2b10
Heavy	Host uninfected	Very long-chain specific acyl-CoA dehydrogenase, mitochondrial [OS=Mus musculus]	P50544	Acadvl
Heavy	Host uninfected	septin-2 [OS=Mus musculus]	P42208	2024-09-02
Heavy	Host uninfected	NADPH--cytochrome P450 reductase [OS=Mus musculus]	P37040	Por
Heavy	Host uninfected	alpha-parvin [OS=Mus musculus]	Q9EPC1	Parva
Heavy	Host uninfected	Phosphatidylinositol-binding clathrin assembly protein [OS=Mus musculus]	Q7M6Y3-1	Picalm
Heavy	Host uninfected	Estradiol 17-beta-dehydrogenase 11 [OS=Mus musculus]	Q9EQ06	Hsd17b11
Heavy	Host uninfected	H-2 class I histocompatibility antigen, D-D alpha chain [OS=Mus musculus]	P01900	LOC101056446; H2-D1; LOC102641613
Heavy	Host uninfected	Long-chain specific acyl-CoA dehydrogenase, mitochondrial [OS=Mus musculus]	P51174	Acadl
Heavy	Host uninfected	Ubiquitin-like modifier-activating enzyme 1 [OS=Mus musculus]	Q02053	Uba1
Heavy	Host uninfected	ADP-ribosylation factor 1-like 2 OS=Pneumocystis murina (strain B123) OX=1069680 GN=PNEG_01119 PE=3 SV=1	M7PIX8	PNEG_01119
Heavy	Host uninfected	Fatty aldehyde dehydrogenase [OS=Mus musculus]	P47740	Aldh3a2
Heavy	Host uninfected	AP-2 complex subunit alpha-1 [OS=Mus musculus]	P17426	Ap2a1
Heavy	Host uninfected	Erbin [OS=Mus musculus]	Q80TH2	Erbb2ip; Erbin
Heavy	Host uninfected	Ras-related protein Rab-1A [OS=Mus musculus]	P62821	Rab1; Rab1a
Heavy	Host uninfected	ADP-ribosylation factor 3 [OS=Mus musculus]	P61205	Arf3
Heavy	Host uninfected	Ras-related protein Rab-5C [OS=Mus musculus]	P35278	Rab5c
Heavy	Host uninfected	Protein-glutamine gamma-glutamyltransferase 2 [OS=Mus musculus]	P21981	Tgm2
Heavy	Host uninfected	Murinoglobulin-1 [OS=Mus musculus]	P28665	Mug1
Heavy	Host uninfected	histone H4 [OS=Mus musculus]	P62806	Hist4h4; Hist1h4a; Hist1h4k; Hist1h4c; Hist1h4i; Hist1h4n; Hist1h4h; Hist1h4f; Hist1h4j; Hist1h4b; Hist1h4m; Hist1h4d; Hist2h4; LOC100862646; LOC102641229
Heavy	Host uninfected	Myoferlin [OS=Mus musculus]	Q69ZN7-1	Myof
Heavy	Host uninfected	Nucleolin [OS=Mus musculus]	P09405	Ncl
Heavy	Host uninfected	epoxide hydrolase 1 [OS=Mus musculus]	Q9D379	Ephx1
Heavy	Host uninfected	Ras-related protein Rab-14 [OS=Mus musculus]	Q91V41	Rab14
Heavy	Host uninfected	Podocalyxin [OS=Mus musculus]	Q9R0M4	Podxl
Heavy	Host uninfected	Gelsolin [OS=Mus musculus]	P13020-1	Gsn
Heavy	Host uninfected	Hydroxyacyl-coenzyme A dehydrogenase, mitochondrial [OS=Mus musculus]	Q61425	Hadh
Heavy	Host uninfected	UDP-glucose:glycoprotein glucosyltransferase 1 [OS=Mus musculus]	Q6P5E4	Uggt1
Heavy	Host uninfected	ras-related protein rab-10 [OS=Mus musculus]	P61027	Rab10
Heavy	Host uninfected	Pyruvate dehydrogenase E1 component subunit alpha, somatic form, mitochondrial [OS=Mus musculus]	P35486	Pdha1
Heavy	Host uninfected	proteasome activator complex subunit 2 [OS=Mus musculus]	P97372	Psme2; Psme2b; Psme2b-ps
Heavy	Host uninfected	Lactadherin [OS=Mus musculus]	P21956-1	Mfge8
Heavy	Host uninfected	Isoform 2 of Synaptophysin-like protein 1 [OS=Mus musculus]	O09117-2	Sypl
Heavy	Host uninfected	cullin-associated nedd8-dissociated protein 1 [OS=Mus musculus]	Q6ZQ38	Cand1
Heavy	Host infected	Annexin A2 [OS=Mus musculus]	P07356	Anxa2
Heavy	Host infected	78 kDa glucose-regulated protein [OS=Mus musculus]	P20029	Hspa5
Heavy	Host infected	Carbonyl reductase [NADPH] 2 [OS=Mus musculus]	P08074	Cbr2
Heavy	Host infected	Angiotensin-converting enzyme [OS=Mus musculus]	P09470	Ace
Heavy	Host infected	Protein disulfide-isomerase [OS=Mus musculus]	P09103	P4hb
Heavy	Host infected	Protein disulfide-isomerase A3 [OS=Mus musculus]	P27773	Pdia3
Heavy	Host infected	60 kDa heat shock protein, mitochondrial [OS=Mus musculus]	P63038-1	Hspd1
Heavy	Host infected	Hemoglobin subunit beta-1 [OS=Mus musculus]	P02088	Hbb-b1; Beta-s; Hbb-bs; Hbb-bt
Heavy	Host infected	Vimentin [OS=Mus musculus]	P20152	Vim
Heavy	Host infected	ATP synthase subunit beta, mitochondrial [OS=Mus musculus]	P56480	Atp5b
Heavy	Host infected	Hemoglobin subunit alpha [OS=Mus musculus]	P01942	Hba-a1; Hba-a2
Heavy	Host infected	Aldehyde dehydrogenase, mitochondrial [OS=Mus musculus]	P47738	Aldh2
Heavy	Host infected	Endoplasmin [OS=Mus musculus]	P08113	Hsp90b1
Heavy	Host infected	ATP synthase subunit alpha, mitochondrial [OS=Mus musculus]	Q03265	Atp5a1
Heavy	Host infected	Serum albumin [OS=Mus musculus]	P07724	Alb
Heavy	Host infected	Actin, cytoplasmic 1 [OS=Mus musculus]	P60710	Actb
Heavy	Host infected	Platelet glycoprotein 4 [OS=Mus musculus]	Q08857	Cd36
Heavy	Host infected	Actin, cytoplasmic 2 [OS=Mus musculus]	P63260	Actg1
Heavy	Host infected	Calreticulin [OS=Mus musculus]	P14211	Calr
Heavy	Host infected	Moesin [OS=Mus musculus]	P26041	Msn
Heavy	Host infected	Malate dehydrogenase, mitochondrial [OS=Mus musculus]	P08249	Mdh2
Heavy	Host infected	Extended synaptotagmin-1 [OS=Mus musculus]	Q3U7R1	Esyt1
Heavy	Host infected	Carboxylesterase 1D [OS=Mus musculus]	Q8VCT4	Ces1d
Heavy	Host infected	Protein disulfide-isomerase A6 [OS=Mus musculus]	Q922R8	Pdia6
Heavy	Host infected	Spectrin alpha chain, non-erythrocytic 1 [OS=Mus musculus]	P16546	Spna2; Sptan1
Heavy	Host infected	Heat shock cognate 71 kDa protein [OS=Mus musculus]	P63017	Hspa8
Heavy	Host infected	Hemoglobin subunit beta-2 [OS=Mus musculus]	P02089	Hbb-b2
Heavy	Host infected	Integrin beta-1 [OS=Mus musculus]	P09055	Itgb1
Heavy	Host infected	ADP/ATP translocase 1 [OS=Mus musculus]	P48962	Slc25a4
Heavy	Host infected	ADP/ATP translocase 2 [OS=Mus musculus]	P51881	Slc25a5
Heavy	Host infected	advanced glycosylation end product-specific receptor [OS=Mus musculus]	Q62151	Ager
Heavy	Host infected	Xanthine dehydrogenase/oxidase [OS=Mus musculus]	Q00519	Xdh
Heavy	Host infected	Chaperone DnaK OS=Pneumocystis murina (strain B123) OX=1069680 GN=PNEG_03406 PE=3 SV=1	M7NI55	PNEG_03406
Heavy	Host infected	peptidyl-prolyl cis-trans isomerase A [OS=Mus musculus]	P17742	Ppia
Heavy	Host infected	Very long-chain specific acyl-CoA dehydrogenase, mitochondrial [OS=Mus musculus]	P50544	Acadvl
Heavy	Host infected	Chitinase-like protein 3 [OS=Mus musculus]	O35744	Chi3l3; Chil3
Heavy	Host infected	Aconitate hydratase, mitochondrial [OS=Mus musculus]	Q99KI0	Aco2
Heavy	Host infected	tubulin beta-5 chain [OS=Mus musculus]	P99024	Tubb5
Heavy	Host infected	tubulin alpha-1A chain [OS=Mus musculus]	P68369	Tuba1a
Heavy	Host infected	Talin-1 [OS=Mus musculus]	P26039	Tln1
Heavy	Host infected	Microfibril-associated glycoprotein 4 [OS=Mus musculus]	Q9D1H9-1	Mfap4
Heavy	Host infected	guanine nucleotide-binding protein G(i) subunit alpha-2 [OS=Mus musculus]	P08752	Gnai2
Heavy	Host infected	Plastin-2 [OS=Mus musculus]	Q61233	Lcp1
Heavy	Host infected	H-2 class I histocompatibility antigen, D-D alpha chain [OS=Mus musculus]	P01900	LOC101056446; H2-D1; LOC102641613
Heavy	Host infected	Aspartate aminotransferase, mitochondrial [OS=Mus musculus]	P05202	Got2
Heavy	Host infected	Cell division control protein 42 homolog [OS=Mus musculus]	P60766-2	Cdc42
Heavy	Host infected	Cathepsin B [OS=Mus musculus]	P10605	Ctsb
Heavy	Host infected	Vinculin [OS=Mus musculus]	Q64727	Vcl
Heavy	Host infected	Uncharacterized protein OS=Pneumocystis murina (strain B123) OX=1069680 GN=PNEG_03614 PE=4 SV=1	M7NM54	PNEG_03614
Heavy	Host infected	Trifunctional enzyme subunit alpha, mitochondrial [OS=Mus musculus]	Q8BMS1	Hadha
Heavy	Host infected	annexin A1 [OS=Mus musculus]	P10107	Anxa1
Heavy	Host infected	Sodium/potassium-transporting ATPase subunit alpha-1 [OS=Mus musculus]	Q8VDN2	Atp1a1
Heavy	Host infected	Elongation factor 2 [OS=Mus musculus]	P58252	Eef2
Heavy	Host infected	Isocitrate dehydrogenase [NADP], mitochondrial [OS=Mus musculus]	P54071	Idh2
Heavy	Host infected	adenylyl cyclase-associated protein 1 [OS=Mus musculus]	P40124	Cap1
Heavy	Host infected	Intercellular adhesion molecule 1 [OS=Mus musculus]	P13597-1	Icam1
Heavy	Host infected	Ras-related protein Rap-1b [OS=Mus musculus]	Q99JI6	Rap1b
Heavy	Host infected	Dimethylaniline monooxygenase [N-oxide-forming] 1 [OS=Mus musculus]	P50285	Fmo1
Heavy	Host infected	Peroxiredoxin-5, mitochondrial [OS=Mus musculus]	P99029	Prdx5
Heavy	Host infected	Stress-70 protein, mitochondrial [OS=Mus musculus]	P38647	Hspa9
Heavy	Host infected	Tubulin alpha-4A chain [OS=Mus musculus]	P68368	Tuba4a
Heavy	Host infected	Cathepsin D [OS=Mus musculus]	P18242	Ctsd
Heavy	Host infected	actin, gamma-enteric smooth muscle [OS=Mus musculus]	P63268	Actg2
Heavy	Host infected	Transgelin-2 [OS=Mus musculus]	Q9WVA4	Tagln2
Heavy	Host infected	3-hydroxyacyl-CoA dehydrogenase type-2 [OS=Mus musculus]	O08756	Hsd17b10
Heavy	Host infected	2-oxoglutarate dehydrogenase, mitochondrial [OS=Mus musculus]	Q60597	Ogdh
Heavy	Host infected	caveolae-associated protein 1 [OS=Mus musculus]	O54724	Ptrf; Cavin1
Heavy	Host infected	Synaptic vesicle membrane protein VAT-1 homolog [OS=Mus musculus]	Q62465	Vat1
Heavy	Host infected	Isoform 2 of Tropomyosin alpha-3 chain [OS=Mus musculus]	P21107-2	Tpm3
Heavy	Host infected	HATPase_c domain-containing protein OS=Pneumocystis murina (strain B123) OX=1069680 GN=PNEG_03319 PE=3 SV=1	M7NIR6	PNEG_03319
Heavy	Host infected	14-3-3 protein zeta/delta [OS=Mus musculus]	P63101	Ywhaz
Heavy	Host infected	annexin A5 [OS=Mus musculus]	P48036	Anxa5
Heavy	Host infected	Hsp72-like protein OS=Pneumocystis murina (strain B123) OX=1069680 GN=PNEG_02587 PE=3 SV=1	M7NKU6	PNEG_02587
Heavy	Host infected	Superoxide dismutase [Mn], mitochondrial [OS=Mus musculus]	P09671	Sod2
Heavy	Host infected	h-2 class I histocompatibility antigen, K-D alpha chain [OS=Mus musculus]	P01902	H2-K1; LOC101056305
Heavy	Host infected	Prelamin-A/C [OS=Mus musculus]	P48678-1	Lmna
Heavy	Host infected	Calnexin [OS=Mus musculus]	P35564	Canx
Heavy	Host infected	Alpha-actinin-1 [OS=Mus musculus]	Q7TPR4	Actn1
Heavy	Host infected	Periaxin [OS=Mus musculus]	O55103	Prx
Heavy	Host infected	ATP synthase subunit beta OS=Pneumocystis murina (strain B123) OX=1069680 GN=PNEG_00966 PE=3 SV=1	M7PK55	PNEG_00966
Heavy	Host infected	Alpha-actinin-4 [OS=Mus musculus]	P57780	Actn4
Heavy	Host infected	Cytochrome P450 4B1 [OS=Mus musculus]	Q64462	Cyp4b1
Heavy	Host infected	Transitional endoplasmic reticulum ATPase [OS=Mus musculus]	Q01853	Vcp
Heavy	Host infected	L-lactate dehydrogenase A chain [OS=Mus musculus]	P06151	Ldha
Heavy	Host infected	Succinyl-CoA:3-ketoacid coenzyme A transferase 1, mitochondrial [OS=Mus musculus]	Q9D0K2	Oxct1
Heavy	Host infected	Tropomyosin alpha-4 chain [OS=Mus musculus]	Q6IRU2	Tpm4
Heavy	Host infected	Serine protease inhibitor A3K [OS=Mus musculus]	P07759	Serpina3k
Heavy	Host infected	Laminin subunit beta-1 [OS=Mus musculus]	P02469	Lamb1
Heavy	Host infected	Hypoxia up-regulated protein 1 [OS=Mus musculus]	Q9JKR6	Hyou1
Heavy	Host infected	Glutamate dehydrogenase 1, mitochondrial [OS=Mus musculus]	P26443	Glud1
Heavy	Host infected	Acetyl-CoA acetyltransferase, mitochondrial [OS=Mus musculus]	Q8QZT1	Acat1
Heavy	Host infected	ras-related protein Rab-7a [OS=Mus musculus]	P51150	Rab7
Heavy	Host infected	Isoform 2 of Immunity-related GTPase family M protein 1 [OS=Mus musculus]	Q60766-2	Irgm1
Heavy	Host infected	Transketolase [OS=Mus musculus]	P40142	Tkt
Heavy	Host infected	citrate synthase, mitochondrial [OS=Mus musculus]	Q9CZU6	Cs
Heavy	Host infected	H-2 class II histocompatibility antigen, A-D alpha chain [OS=Mus musculus]	P04228	H2-Aa
Heavy	Host infected	Dimethylaniline monooxygenase [N-oxide-forming] 2 [OS=Mus musculus]	Q8K2I3	Fmo2
Heavy	Host infected	annexin A4 [OS=Mus musculus]	P97429	Anxa4
Heavy	Host infected	radixin [OS=Mus musculus]	P26043	Rdx
Heavy	Host infected	annexin A6 [OS=Mus musculus]	P14824	Anxa6
Heavy	Host infected	Guanine nucleotide-binding protein G(I)/G(S)/G(T) subunit beta-1 [OS=Mus musculus]	P62874	Gnb1
Heavy	Host infected	Antigen peptide transporter 1 [OS=Mus musculus]	P21958	Tap1
Heavy	Host infected	Uncharacterized protein OS=Pneumocystis murina (strain B123) OX=1069680 GN=PNEG_03434 PE=4 SV=1	M7PCV6	PNEG_03434
Heavy	Host infected	Ras suppressor protein 1 [OS=Mus musculus]	Q01730	Rsu1
Heavy	Host infected	Polypyrimidine tract-binding protein 1 [OS=Mus musculus]	P17225	Ptbp1
Heavy	Host infected	profilin-1 [OS=Mus musculus]	P62962	Pfn1
Heavy	Host infected	Protein S100-A8 [OS=Mus musculus]	P27005	S100a8
Heavy	Host infected	interferon-inducible GTPase 1 [OS=Mus musculus]	Q9QZ85	Iigp1; Iigp1b
Heavy	Host infected	NADH-cytochrome b5 reductase 3 [OS=Mus musculus]	Q9DCN2	Cyb5r3
Heavy	Host infected	3-ketoacyl-CoA thiolase, mitochondrial [OS=Mus musculus]	Q8BWT1	Acaa2
Heavy	Host infected	Integrin alpha-3 [OS=Mus musculus]	Q62470	Itga3
Heavy	Host infected	proteasome activator complex subunit 2 [OS=Mus musculus]	P97372	Psme2; Psme2b; Psme2b-ps
Heavy	Host infected	H-2 class II histocompatibility antigen, A-D beta chain [OS=Mus musculus]	P01921	H2-Ab1
Heavy	Host infected	Actin-related protein 2/3 complex subunit 2 [OS=Mus musculus]	Q9CVB6	Arpc2
Heavy	Host infected	Caveolin-1 [OS=Mus musculus]	P49817	Cav1
Heavy	Host infected	Enoyl-CoA delta isomerase 1, mitochondrial [OS=Mus musculus]	P42125	Eci1
Heavy	Host infected	Tapasin [OS=Mus musculus]	Q9R233	Tapbp
Heavy	Host infected	Electron transfer flavoprotein subunit alpha, mitochondrial [OS=Mus musculus]	Q99LC5	Etfa
Heavy	Host infected	Neutral alpha-glucosidase AB [OS=Mus musculus]	Q8BHN3	Ganab
Heavy	Host infected	Filamin-A [OS=Mus musculus]	Q8BTM8	Flna
Heavy	Host infected	Chloride intracellular channel protein 4 [OS=Mus musculus]	Q9QYB1	Clic4
Heavy	Host infected	T-complex protein 1 subunit epsilon [OS=Mus musculus]	P80316	Cct5
Heavy	Host infected	14-3-3 protein theta [OS=Mus musculus]	P68254-1	Ywhaq; LOC102634437; Gm11226; Ywhaq-ps3; Cdk5rap2
Heavy	Host infected	H-2 class I histocompatibility antigen, L-D alpha chain [OS=Mus musculus]	P01897	H2-D1
Heavy	Host infected	H-2 class II histocompatibility antigen, E-K alpha chain [OS=Mus musculus]	P04224	H2-Ea-ps
Heavy	Host infected	Dihydrolipoyl dehydrogenase, mitochondrial [OS=Mus musculus]	O08749	Dld
Heavy	Host infected	dipeptidase 1 [OS=Mus musculus]	P31428	Dpep1
Heavy	Host infected	heat shock 70 kDa protein 1A [OS=Mus musculus]	Q61696	Hspa1a; Hspa1b
Heavy	Host infected	Protein disulfide-isomerase OS=Pneumocystis murina (strain B123) OX=1069680 GN=PNEG_03149 PE=3 SV=1	M7NMG4	PNEG_03149
Heavy	Host infected	Ferritin light chain 1 [OS=Mus musculus]	P29391	Ftl1
Heavy	Host infected	Tropomyosin alpha-1 chain [OS=Mus musculus]	P58771-1	Tpm1
Heavy	Host infected	Protein-glutamine gamma-glutamyltransferase 2 [OS=Mus musculus]	P21981	Tgm2
Heavy	Host infected	Succinate dehydrogenase [ubiquinone] flavoprotein subunit, mitochondrial [OS=Mus musculus]	Q8K2B3	Sdha
Heavy	Host infected	AP-2 complex subunit beta [OS=Mus musculus]	Q9DBG3	Ap2b1
Heavy	Host infected	glycine amidinotransferase, mitochondrial [OS=Mus musculus]	Q9D964	Gatm
Heavy	Host infected	Clathrin heavy chain 1 [OS=Mus musculus]	Q68FD5	Cltc
Heavy	Host infected	lysozyme c-2 [OS=Mus musculus]	P08905	Lyz2
Heavy	Host infected	Galectin-3-binding protein [OS=Mus musculus]	Q07797	Lgals3bp
Heavy	Host infected	Long-chain specific acyl-CoA dehydrogenase, mitochondrial [OS=Mus musculus]	P51174	Acadl
Heavy	Host infected	guanine nucleotide-binding protein subunit alpha-11 [OS=Mus musculus]	P21278	Gna11
Heavy	Host infected	Complement C3 [OS=Mus musculus]	P01027-1	C3
Heavy	Host infected	Hsp60-like protein OS=Pneumocystis murina (strain B123) OX=1069680 GN=PNEG_02584 PE=3 SV=1	M7P5X2	PNEG_02584
Heavy	Host infected	Cofilin-1 [OS=Mus musculus]	P18760	Cfl1
Heavy	Host infected	Msg2_C domain-containing protein OS=Pneumocystis murina (strain B123) OX=1069680 GN=PNEG_04005 PE=4 SV=1	A0A0W4ZX34	PNEG_04005
Heavy	Host infected	Heat shock protein HSP 90-beta [OS=Mus musculus]	P11499	Hsp90ab1
Heavy	Host infected	cathepsin S [OS=Mus musculus]	O70370	Ctss
Heavy	Host infected	Carbonic anhydrase 2 [OS=Mus musculus]	P00920	Car2
Heavy	Host infected	Msg2_C domain-containing protein OS=Pneumocystis murina (strain B123) OX=1069680 GN=PNEG_02989 PE=4 SV=2	M7NNJ9	PNEG_02989
Heavy	Host infected	Lamin-B1 [OS=Mus musculus]	P14733	Lmnb1
Heavy	Host infected	Myosin light polypeptide 6 [OS=Mus musculus]	Q60605	Myl6
Heavy	Host infected	Pulmonary surfactant-associated protein B [OS=Mus musculus]	P50405	Sftpb
Heavy	Host infected	Myosin-9 [OS=Mus musculus]	Q8VDD5	Myh9
Heavy	Host infected	Ras-related protein Rab-11B [OS=Mus musculus]	P46638	Rab11b
Heavy	Host infected	Isoform 2 of Tropomyosin beta chain [OS=Mus musculus]	P58774-2	Tpm2
Heavy	Host infected	EH domain-containing protein 2 [OS=Mus musculus]	Q8BH64	Ehd2
Heavy	Host infected	AP-1 complex subunit beta-1 [OS=Mus musculus]	O35643	Ap1b1
Heavy	Host infected	Nucleobindin-1 [OS=Mus musculus]	Q02819	Nucb1
Heavy	Host infected	Neutral cholesterol ester hydrolase 1 [OS=Mus musculus]	Q8BLF1	Nceh1
Heavy	Host infected	macrophage mannose receptor 1 [OS=Mus musculus]	Q61830	Mrc1
Heavy	Host infected	Corticosteroid 11-beta-dehydrogenase isozyme 1 [OS=Mus musculus]	P50172	Hsd11b1
Heavy	Host infected	Dihydropyrimidinase-related protein 2 [OS=Mus musculus]	O08553	Dpysl2
Heavy	Host infected	catalase [OS=Mus musculus]	P24270	Cat
Heavy	Host infected	Tryptophan--tRNA ligase, cytoplasmic [OS=Mus musculus]	P32921	Wars
Heavy	Host infected	Na(+)/H(+) exchange regulatory cofactor NHE-RF2 [OS=Mus musculus]	Q9JHL1	Slc9a3r2
Heavy	Host infected	Protein disulfide-isomerase A4 [OS=Mus musculus]	P08003	Pdia4
Heavy	Host infected	Guanylate-binding protein 2 [OS=Mus musculus]	Q9Z0E6	Gbp2
Heavy	Host infected	ATP synthase subunit O, mitochondrial [OS=Mus musculus]	Q9DB20	Atp5o; LOC100047429; LOC102641678
Heavy	Host infected	Ras-related protein Rab-2A [OS=Mus musculus]	P53994	Rab2a
Heavy	Host infected	Ornithine aminotransferase, mitochondrial [OS=Mus musculus]	P29758	Oat
Heavy	Host infected	Mimecan [OS=Mus musculus]	Q62000	Ogn
Heavy	Host infected	glyceraldehyde-3-phosphate dehydrogenase [OS=Mus musculus]	P16858	Gapdh; Gm20899; LOC100042025; Gapdh-ps15; Gm12033
Heavy	Host infected	Uncharacterized protein OS=Pneumocystis murina (strain B123) OX=1069680 GN=PNEG_00446 PE=3 SV=1	M7NRP9	PNEG_00446
Heavy	Host infected	Guanine nucleotide-binding protein G(Q) subunit alpha [OS=Mus musculus]	P21279	Gnaq
Heavy	Host infected	Serum paraoxonase/lactonase 3 [OS=Mus musculus]	Q62087	Pon3
Heavy	Host infected	Integrin alpha-1 [OS=Mus musculus]	Q3V3R4	Itga1
Heavy	Host infected	3-ketoacyl-CoA thiolase B, peroxisomal [OS=Mus musculus]	Q8VCH0	Acaa1b
Heavy	Host infected	Arginase-1 [OS=Mus musculus]	Q61176	Arg1
Heavy	Host infected	neutrophilic granule protein [OS=Mus musculus]	O08692	Ngp
Heavy	Host infected	Dipeptidyl peptidase 1 [OS=Mus musculus]	P97821	Ctsc
Heavy	Host infected	Acid ceramidase [OS=Mus musculus]	Q9WV54	Asah1
Heavy	Host infected	COesterase domain-containing protein OS=Pneumocystis murina (strain B123) OX=1069680 GN=PNEG_01454 PE=3 SV=1	M7P8I8	PNEG_01454
Heavy	Host infected	EH domain-containing protein 4 [OS=Mus musculus]	Q9EQP2	Ehd4
Heavy	Host infected	heterogeneous nuclear ribonucleoproteins A2/B1 [OS=Mus musculus]	O88569	Hnrnpa2b1
Heavy	Host infected	Epididymal secretory protein E1 [OS=Mus musculus]	Q9Z0J0	Npc2
Heavy	Host infected	Coronin-1A [OS=Mus musculus]	O89053	Coro1a
Heavy	Host infected	Apolipoprotein A-I [OS=Mus musculus]	Q00623	Apoa1
Heavy	Host infected	Cytochrome c oxidase subunit 5A, mitochondrial [OS=Mus musculus]	P12787	Cox5a
Heavy	Host infected	Pyruvate kinase PKM [OS=Mus musculus]	P52480	Pkm
Heavy	Host infected	T-complex protein 1 subunit beta [OS=Mus musculus]	P80314	Cct2
Heavy	Host infected	Transforming protein RhoA [OS=Mus musculus]	Q9QUI0	Rhoa
Heavy	Host infected	Ras-related protein Rab-1A [OS=Mus musculus]	P62821	Rab1; Rab1a
Heavy	Host infected	ATP synthase subunit alpha OS=Pneumocystis murina (strain B123) OX=1069680 GN=PNEG_00081 PE=3 SV=1	M7NWG8	PNEG_00081
Heavy	Host infected	Glucosidase 2 subunit beta [OS=Mus musculus]	O08795-1	Prkcsh
Heavy	Host infected	Pro-cathepsin H [OS=Mus musculus]	P49935	Ctsh
Heavy	Host infected	annexin A3 [OS=Mus musculus]	O35639	Anxa3
Heavy	Host infected	Guanylate-binding protein 5 [OS=Mus musculus]	Q8CFB4	Gbp5
Heavy	Host infected	GDH/6PGL endoplasmic bifunctional protein [OS=Mus musculus]	Q8CFX1	H6pd
Heavy	Host infected	Dolichyl-diphosphooligosaccharide--protein glycosyltransferase subunit 2 [OS=Mus musculus]	Q9DBG6	Rpn2
Heavy	Host infected	Endothelial cell-selective adhesion molecule [OS=Mus musculus]	Q925F2	Esam
Heavy	Host infected	Ubiquitin-like modifier-activating enzyme 1 [OS=Mus musculus]	Q02053	Uba1
Heavy	Host infected	Cytochrome P450 2F2 [OS=Mus musculus]	P33267	Cyp2f2
Heavy	Host infected	Serine protease inhibitor A3G [OS=Mus musculus]	Q5I2A0	Serpina3g
Heavy	Host infected	Hydroxyacyl-coenzyme A dehydrogenase, mitochondrial [OS=Mus musculus]	Q61425	Hadh
Heavy	Host infected	Dehydrogenase/reductase SDR family member 1 [OS=Mus musculus]	Q99L04	Dhrs1
Heavy	Host infected	UDP-glucose:glycoprotein glucosyltransferase 1 [OS=Mus musculus]	Q6P5E4	Uggt1
Heavy	Host infected	Estradiol 17-beta-dehydrogenase 11 [OS=Mus musculus]	Q9EQ06	Hsd17b11
Heavy	Host infected	prolow-density lipoprotein receptor-related protein 1 [OS=Mus musculus]	Q91ZX7	Lrp1
Heavy	Host infected	peptidyl-prolyl cis-trans isomerase B [OS=Mus musculus]	P24369	Ppib
Heavy	Host infected	CD9 antigen [OS=Mus musculus]	P40240	Cd9
Heavy	Pathogen and host	Ubiquitin-60S ribosomal protein L40 OS=Pneumocystis murina (strain B123) OX=1069680 GN=PNEG_00053 PE=4 SV=1	M7NWD9	PNEG_00053
Heavy	Pathogen and host	lysozyme c-2 [OS=Mus musculus]	P08905	Lyz2
Heavy	Pathogen and host	Hemoglobin subunit beta-1 [OS=Mus musculus]	P02088	Hbb-b1; Beta-s; Hbb-bs; Hbb-bt
Heavy	Pathogen and host	Hemoglobin subunit alpha [OS=Mus musculus]	P01942	Hba-a1; Hba-a2
Heavy	Pathogen and host	peptidyl-prolyl cis-trans isomerase A [OS=Mus musculus]	P17742	Ppia
Heavy	Pathogen and host	annexin A1 [OS=Mus musculus]	P10107	Anxa1
Heavy	Pathogen and host	profilin-1 [OS=Mus musculus]	P62962	Pfn1
Heavy	Pathogen and host	Hemoglobin subunit beta-2 [OS=Mus musculus]	P02089	Hbb-b2
Heavy	Pathogen and host	Peptidyl-prolyl cis-trans isomerase OS=Pneumocystis murina (strain B123) OX=1069680 GN=PNEG_02449 PE=3 SV=1	M7P5E7	PNEG_02449
Heavy	Pathogen and host	Ubiquitin-60S ribosomal protein L40 [OS=Mus musculus]	P62984	Uba52; Gm11808
Heavy	Pathogen and host	Transgelin-2 [OS=Mus musculus]	Q9WVA4	Tagln2
Heavy	Pathogen and host	Annexin A2 [OS=Mus musculus]	P07356	Anxa2
Heavy	Pathogen and host	Chitinase-like protein 3 [OS=Mus musculus]	O35744	Chi3l3; Chil3
Heavy	Pathogen and host	Isoform Cytoplasmic+peroxisomal of Peroxiredoxin-5, mitochondrial [OS=Mus musculus]	P99029-2	Prdx5
Heavy	Pathogen and host	Cytochrome c, somatic [OS=Mus musculus]	P62897	Cycs; Gm10053
Heavy	Pathogen and host	Peroxiredoxin-2 [OS=Mus musculus]	Q61171	Prdx2
Heavy	Pathogen and host	cathepsin S [OS=Mus musculus]	O70370	Ctss
Heavy	Pathogen and host	Epididymal secretory protein E1 [OS=Mus musculus]	Q9Z0J0	Npc2
Heavy	Pathogen and host	Fatty acid-binding protein, epidermal [OS=Mus musculus]	Q05816	Fabp5
Heavy	Pathogen and host	peptidyl-prolyl cis-trans isomerase B [OS=Mus musculus]	P24369	Ppib
Heavy	Pathogen and host	Thioredoxin OS=Pneumocystis murina (strain B123) OX=1069680 GN=PNEG_00288 PE=3 SV=1	M7NVF6	PNEG_00288
Heavy	Pathogen and host	Cathepsin B [OS=Mus musculus]	P10605	Ctsb
Heavy	Pathogen and host	rho GDP-dissociation inhibitor 1 [OS=Mus musculus]	Q99PT1	Arhgdia
Heavy	Pathogen and host	Cytochrome c OS=Pneumocystis murina (strain B123) OX=1069680 GN=PNEG_00557 PE=3 SV=1	M7PM51	PNEG_00557
Heavy	Pathogen and host	Malate dehydrogenase, mitochondrial [OS=Mus musculus]	P08249	Mdh2
Heavy	Pathogen and host	Carbonic anhydrase 2 [OS=Mus musculus]	P00920	Car2
Heavy	Pathogen and host	Peptidyl-prolyl cis-trans isomerase OS=Pneumocystis murina (strain B123) OX=1069680 GN=PNEG_02855 PE=3 SV=1	M7NJ81	PNEG_02855
Heavy	Pathogen and host	annexin A4 [OS=Mus musculus]	P97429	Anxa4
Heavy	Pathogen and host	thiosulfate sulfurtransferase [OS=Mus musculus]	P52196	Tst
Heavy	Pathogen and host	CS domain-containing protein OS=Pneumocystis murina (strain B123) OX=1069680 GN=PNEG_03379 PE=4 SV=1	M7P2Y0	PNEG_03379
Heavy	Pathogen and host	adenylyl cyclase-associated protein 1 [OS=Mus musculus]	P40124	Cap1
Heavy	Pathogen and host	Peptidyl-prolyl cis-trans isomerase F, mitochondrial [OS=Mus musculus]	Q99KR7	Ppif
Heavy	Pathogen and host	Rho GDP-dissociation inhibitor 2 [OS=Mus musculus]	Q61599	Arhgdib
Heavy	Pathogen and host	annexin A5 [OS=Mus musculus]	P48036	Anxa5
Heavy	Pathogen and host	Pro-cathepsin H [OS=Mus musculus]	P49935	Ctsh
Heavy	Pathogen and host	coactosin-like protein [OS=Mus musculus]	Q9CQI6	Cotl1
Heavy	Pathogen and host	Heterogeneous nuclear ribonucleoproteins C1/C2 [OS=Mus musculus]	Q9Z204	Hnrnpc
Heavy	Pathogen and host	High mobility group protein B2 [OS=Mus musculus]	P30681	Hmgb2
Heavy	Pathogen and host	Aldo_ket_red domain-containing protein OS=Pneumocystis murina (strain B123) OX=1069680 GN=PNEG_04328 PE=4 SV=1	A0A0W4ZWW3	PNEG_02367; PNEG_04328
Heavy	Pathogen and host	coiled-coil domain-containing protein 58 [OS=Mus musculus]	Q8R3Q6	Ccdc58
Heavy	Pathogen and host	40S ribosomal protein S28 [OS=Mus musculus]	P62858	Rps28
Heavy	Pathogen and host	NTF2 domain-containing protein OS=Pneumocystis murina (strain B123) OX=1069680 GN=PNEG_03333 PE=4 SV=1	M7NHW5	PNEG_03333
Heavy	Pathogen and host	Cystatin-B [OS=Mus musculus]	Q62426	Cstb
Heavy	Pathogen and host	Mesencephalic astrocyte-derived neurotrophic factor [OS=Mus musculus]	Q9CXI5	Manf
Heavy	Pathogen and host	RNA-binding motif protein, X chromosome [OS=Mus musculus]	Q9WV02-1	Rbmx
Heavy	Pathogen and host	Resistin-like alpha [OS=Mus musculus]	Q9EP95	Retnla
Heavy	Pathogen and host	heterogeneous nuclear ribonucleoproteins A2/B1 [OS=Mus musculus]	O88569	Hnrnpa2b1
Heavy	Pathogen and host	peptidoglycan recognition protein 1 [OS=Mus musculus]	O88593	Pglyrp1
Heavy	Pathogen and host	annexin A3 [OS=Mus musculus]	O35639	Anxa3
Heavy	Pathogen and host	Profilin OS=Pneumocystis murina (strain B123) OX=1069680 GN=PNEG_02179 PE=3 SV=1	M7P6T2	PNEG_02179
Heavy	Pathogen and host	Neutrophil gelatinase-associated lipocalin [OS=Mus musculus]	P11672	Lcn2
Heavy	Pathogen and host	Tubulin polymerization-promoting protein family member 3 [OS=Mus musculus]	Q9CRB6	Tppp3
Heavy	Pathogen and host	Peptidyl-prolyl cis-trans isomerase FKBP2 [OS=Mus musculus]	P45878	Fkbp2
Heavy	Pathogen and host	ADF-H domain-containing protein OS=Pneumocystis murina (strain B123) OX=1069680 GN=PNEG_02593 PE=3 SV=1	M7PFP3	PNEG_02593
Heavy	Pathogen and host	Myeloid-derived growth factor [OS=Mus musculus]	Q9CPT4	D17Wsu104e; Mydgf
Heavy	Pathogen and host	Eosinophil cationic protein 1 [OS=Mus musculus]	P97426	Ear1; LOC101056653
Heavy	Pathogen and host	ubiquitin-conjugating enzyme E2 N [OS=Mus musculus]	P61089	Ube2n
Heavy	Pathogen and host	Allograft inflammatory factor 1 [OS=Mus musculus]	O70200	Aif1
Heavy	Pathogen and host	Eosinophil cationic protein 2 [OS=Mus musculus]	P97425	Ear2
Heavy	Pathogen and host	Ubiquitin-conjugating enzyme E2 D3 [OS=Mus musculus]	P61079	Ube2d3
Heavy	Pathogen and host	flavin reductase (NADPH) [OS=Mus musculus]	Q923D2	Blvrb
Heavy	Pathogen and host	Peptidyl-prolyl cis-trans isomerase FKBP1A [OS=Mus musculus]	P26883	Fkbp1a
Heavy	Pathogen and host	Ubiquitin-like protein pmt3/smt3 OS=Pneumocystis murina (strain B123) OX=1069680 GN=PNEG_02095 PE=4 SV=1	M7NQG2	PNEG_02095
Medium	Host uninfected	Hemoglobin subunit beta-1 [OS=Mus musculus]	P02088	Hbb-b1; Beta-s; Hbb-bs; Hbb-bt
Medium	Host uninfected	Hemoglobin subunit beta-2 [OS=Mus musculus]	P02089	Hbb-b2
Medium	Host uninfected	Hemoglobin subunit alpha [OS=Mus musculus]	P01942	Hba-a1; Hba-a2
Medium	Host uninfected	actin, gamma-enteric smooth muscle [OS=Mus musculus]	P63268	Actg2
Medium	Host infected	Actin, cytoplasmic 1 [OS=Mus musculus]	P60710	Actb
Medium	Host infected	Hemoglobin subunit beta-1 [OS=Mus musculus]	P02088	Hbb-b1; Beta-s; Hbb-bs; Hbb-bt
Medium	Host infected	Hemoglobin subunit alpha [OS=Mus musculus]	P01942	Hba-a1; Hba-a2
Medium	Pathogen and host	Hemoglobin subunit beta-1 [OS=Mus musculus]	P02088	Hbb-b1; Beta-s; Hbb-bs; Hbb-bt
Medium	Pathogen and host	Hemoglobin subunit beta-2 [OS=Mus musculus]	P02089	Hbb-b2
Medium	Pathogen and host	Hemoglobin subunit alpha [OS=Mus musculus]	P01942	Hba-a1; Hba-a2
Medium	Pathogen and host	lysozyme c-2 [OS=Mus musculus]	P08905	Lyz2
Medium	Pathogen and host	Ubiquitin-60S ribosomal protein L40 [OS=Mus musculus]	P62984	Uba52; Gm11808
Medium	Pathogen and host	Ubiquitin-60S ribosomal protein L40 OS=Pneumocystis murina (strain B123) OX=1069680 GN=PNEG_00053 PE=4 SV=1	M7NWD9	PNEG_00053
Medium	Pathogen and host	Actin, cytoplasmic 1 [OS=Mus musculus]	P60710	Actb
Medium	Pathogen and host	Actin, cytoplasmic 2 [OS=Mus musculus]	P63260	Actg1
Medium	Pathogen and host	Peroxiredoxin-2 [OS=Mus musculus]	Q61171	Prdx2
Medium	Pathogen and host	Chitinase-like protein 3 [OS=Mus musculus]	O35744	Chi3l3; Chil3
Medium	Pathogen and host	60 kDa heat shock protein, mitochondrial [OS=Mus musculus]	P63038-1	Hspd1
Medium	Pathogen and host	profilin-1 [OS=Mus musculus]	P62962	Pfn1
Medium	Pathogen and host	annexin A1 [OS=Mus musculus]	P10107	Anxa1
Medium	Pathogen and host	Malate dehydrogenase, mitochondrial [OS=Mus musculus]	P08249	Mdh2
Medium	Pathogen and host	ATP synthase subunit beta, mitochondrial [OS=Mus musculus]	P56480	Atp5b
Medium	Pathogen and host	Heat shock cognate 71 kDa protein [OS=Mus musculus]	P63017	Hspa8
Medium	Pathogen and host	Carbonyl reductase [NADPH] 2 [OS=Mus musculus]	P08074	Cbr2
Medium	Pathogen and host	78 kDa glucose-regulated protein [OS=Mus musculus]	P20029	Hspa5
Medium	Pathogen and host	Serum albumin [OS=Mus musculus]	P07724	Alb
Medium	Pathogen and host	peptidyl-prolyl cis-trans isomerase A [OS=Mus musculus]	P17742	Ppia
Medium	Pathogen and host	Annexin A2 [OS=Mus musculus]	P07356	Anxa2
Medium	Pathogen and host	Protein disulfide-isomerase A3 [OS=Mus musculus]	P27773	Pdia3
Medium	Pathogen and host	ATP synthase subunit beta OS=Pneumocystis murina (strain B123) OX=1069680 GN=PNEG_00966 PE=3 SV=1	M7PK55	PNEG_00966
Medium	Pathogen and host	Hsp72-like protein OS=Pneumocystis murina (strain B123) OX=1069680 GN=PNEG_02587 PE=3 SV=1	M7NKU6	PNEG_02587
Medium	Pathogen and host	Cathepsin D [OS=Mus musculus]	P18242	Ctsd
Medium	Pathogen and host	Peptidyl-prolyl cis-trans isomerase OS=Pneumocystis murina (strain B123) OX=1069680 GN=PNEG_02449 PE=3 SV=1	M7P5E7	PNEG_02449
Medium	Pathogen and host	Hsp60-like protein OS=Pneumocystis murina (strain B123) OX=1069680 GN=PNEG_02584 PE=3 SV=1	M7P5X2	PNEG_02584
Medium	Pathogen and host	Glyceraldehyde-3-phosphate dehydrogenase OS=Pneumocystis murina (strain B123) OX=1069680 GN=PNEG_01876 PE=3 SV=1	M7PGV1	PNEG_01876
Medium	Pathogen and host	cathepsin S [OS=Mus musculus]	O70370	Ctss
Medium	Pathogen and host	Chaperone DnaK OS=Pneumocystis murina (strain B123) OX=1069680 GN=PNEG_03406 PE=3 SV=1	M7NI55	PNEG_03406
Medium	Pathogen and host	Aldehyde dehydrogenase, mitochondrial [OS=Mus musculus]	P47738	Aldh2
Medium	Pathogen and host	Protein disulfide-isomerase OS=Pneumocystis murina (strain B123) OX=1069680 GN=PNEG_03149 PE=3 SV=1	M7NMG4	PNEG_03149
Medium	Pathogen and host	Cytochrome c, somatic [OS=Mus musculus]	P62897	Cycs; Gm10053
Medium	Pathogen and host	Protein disulfide-isomerase A6 [OS=Mus musculus]	Q922R8	Pdia6
Medium	Pathogen and host	Serine protease inhibitor A3K [OS=Mus musculus]	P07759	Serpina3k
Medium	Pathogen and host	Carbonic anhydrase 2 [OS=Mus musculus]	P00920	Car2
Medium	Pathogen and host	Cofilin-1 [OS=Mus musculus]	P18760	Cfl1
Medium	Pathogen and host	annexin A5 [OS=Mus musculus]	P48036	Anxa5
Medium	Pathogen and host	Resistin-like alpha [OS=Mus musculus]	Q9EP95	Retnla
Medium	Pathogen and host	Macrophage-capping protein [OS=Mus musculus]	P24452	Capg
Medium	Pathogen and host	Transketolase [OS=Mus musculus]	P40142	Tkt
Medium	Pathogen and host	Plastin-2 [OS=Mus musculus]	Q61233	Lcp1
Medium	Pathogen and host	rho GDP-dissociation inhibitor 1 [OS=Mus musculus]	Q99PT1	Arhgdia
Medium	Pathogen and host	glyceraldehyde-3-phosphate dehydrogenase [OS=Mus musculus]	P16858	Gapdh; Gm20899; LOC100042025; Gapdh-ps15; Gm12033
Medium	Pathogen and host	annexin A4 [OS=Mus musculus]	P97429	Anxa4
Medium	Pathogen and host	alpha-enolase [OS=Mus musculus]	P17182	Eno1; Gm5506; Eno1b
Medium	Pathogen and host	Protein disulfide-isomerase [OS=Mus musculus]	P09103	P4hb
Medium	Pathogen and host	Aspartate aminotransferase, mitochondrial [OS=Mus musculus]	P05202	Got2
Medium	Pathogen and host	Elongation factor 1-alpha 1 [OS=Mus musculus]	P10126	Eef1a1; LOC101056619
Medium	Pathogen and host	Endoplasmin [OS=Mus musculus]	P08113	Hsp90b1
Medium	Pathogen and host	Vimentin [OS=Mus musculus]	P20152	Vim
Medium	Pathogen and host	Serine protease inhibitor A3G [OS=Mus musculus]	Q5I2A0	Serpina3g
Medium	Pathogen and host	Thioredoxin OS=Pneumocystis murina (strain B123) OX=1069680 GN=PNEG_00288 PE=3 SV=1	M7NVF6	PNEG_00288
Medium	Pathogen and host	annexin A3 [OS=Mus musculus]	O35639	Anxa3
Medium	Pathogen and host	Transgelin-2 [OS=Mus musculus]	Q9WVA4	Tagln2
Medium	Pathogen and host	Lysozyme c-1 [OS=Mus musculus]	P17897	Lyz1
Medium	Pathogen and host	Peroxiredoxin-5, mitochondrial [OS=Mus musculus]	P99029	Prdx5
Low	Host uninfected	Annexin A2 [OS=Mus musculus]	P07356	Anxa2
Low	Host uninfected	lysozyme c-2 [OS=Mus musculus]	P08905	Lyz2
Low	Host uninfected	Hemoglobin subunit beta-1 [OS=Mus musculus]	P02088	Hbb-b1; Beta-s; Hbb-bs; Hbb-bt
Low	Host uninfected	peptidyl-prolyl cis-trans isomerase A [OS=Mus musculus]	P17742	Ppia
Low	Host uninfected	Hemoglobin subunit alpha [OS=Mus musculus]	P01942	Hba-a1; Hba-a2
Low	Host uninfected	annexin A1 [OS=Mus musculus]	P10107	Anxa1
Low	Host uninfected	Transgelin-2 [OS=Mus musculus]	Q9WVA4	Tagln2
Low	Host uninfected	Hemoglobin subunit beta-2 [OS=Mus musculus]	P02089	Hbb-b2
Low	Host uninfected	Periaxin [OS=Mus musculus]	O55103	Prx
Low	Host uninfected	Ras suppressor protein 1 [OS=Mus musculus]	Q01730	Rsu1
Low	Host uninfected	profilin-1 [OS=Mus musculus]	P62962	Pfn1
Low	Host uninfected	Ubiquitin-60S ribosomal protein L40 [OS=Mus musculus]	P62984	Uba52; Gm11808
Low	Host uninfected	Calmodulin [OS=Mus musculus]	P62204	Calm3; Calm1; Calm2
Low	Host uninfected	Malate dehydrogenase, mitochondrial [OS=Mus musculus]	P08249	Mdh2
Low	Host uninfected	Cytochrome c oxidase subunit 6B1 [OS=Mus musculus]	P56391	Cox6b1
Low	Host uninfected	annexin A4 [OS=Mus musculus]	P97429	Anxa4
Low	Host uninfected	Tubulin polymerization-promoting protein family member 3 [OS=Mus musculus]	Q9CRB6	Tppp3
Low	Host uninfected	Cytochrome c, somatic [OS=Mus musculus]	P62897	Cycs; Gm10053
Low	Host uninfected	adenylyl cyclase-associated protein 1 [OS=Mus musculus]	P40124	Cap1
Low	Host uninfected	Cofilin-1 [OS=Mus musculus]	P18760	Cfl1
Low	Host uninfected	rho GDP-dissociation inhibitor 1 [OS=Mus musculus]	Q99PT1	Arhgdia
Low	Host uninfected	annexin A5 [OS=Mus musculus]	P48036	Anxa5
Low	Host uninfected	Chitinase-like protein 3 [OS=Mus musculus]	O35744	Chi3l3; Chil3
Low	Host uninfected	annexin A3 [OS=Mus musculus]	O35639	Anxa3
Low	Host uninfected	Peroxiredoxin-5, mitochondrial [OS=Mus musculus]	P99029	Prdx5
Low	Host uninfected	Indolethylamine N-methyltransferase [OS=Mus musculus]	P40936	Inmt
Low	Host uninfected	Neutrophil elastase [OS=Mus musculus]	Q3UP87	Elane
Low	Host uninfected	Eukaryotic translation initiation factor 4H [OS=Mus musculus]	Q9WUK2-1	Eif4h
Low	Host uninfected	Mimecan [OS=Mus musculus]	Q62000	Ogn
Low	Host uninfected	peptidyl-prolyl cis-trans isomerase B [OS=Mus musculus]	P24369	Ppib
Low	Host uninfected	Protein S100-A9 [OS=Mus musculus]	P31725	S100a9
Low	Host uninfected	Protein S100-A8 [OS=Mus musculus]	P27005	S100a8
Low	Host uninfected	heterogeneous nuclear ribonucleoproteins A2/B1 [OS=Mus musculus]	O88569	Hnrnpa2b1
Low	Host uninfected	advanced glycosylation end product-specific receptor [OS=Mus musculus]	Q62151	Ager
Low	Host uninfected	RNA-binding motif protein, X chromosome [OS=Mus musculus]	Q9WV02-1	Rbmx
Low	Host uninfected	Adapter molecule crk [OS=Mus musculus]	Q64010-1	Crk
Low	Host uninfected	peptidoglycan recognition protein 1 [OS=Mus musculus]	O88593	Pglyrp1
Low	Host uninfected	Mesencephalic astrocyte-derived neurotrophic factor [OS=Mus musculus]	Q9CXI5	Manf
Low	Host uninfected	thiosulfate sulfurtransferase [OS=Mus musculus]	P52196	Tst
Low	Host uninfected	Peroxiredoxin-2 [OS=Mus musculus]	Q61171	Prdx2
Low	Host uninfected	Lysozyme c-1 [OS=Mus musculus]	P17897	Lyz1
Low	Host uninfected	Succinate--CoA ligase [ADP/GDP-forming] subunit alpha, mitochondrial [OS=Mus musculus]	Q9WUM5	Suclg1
Low	Host uninfected	Carbonic anhydrase 2 [OS=Mus musculus]	P00920	Car2
Low	Host uninfected	Myosin light polypeptide 6 [OS=Mus musculus]	Q60605	Myl6
Low	Host uninfected	ubiquitin-conjugating enzyme E2 N [OS=Mus musculus]	P61089	Ube2n
Low	Host uninfected	Protein disulfide-isomerase A3 [OS=Mus musculus]	P27773	Pdia3
Low	Host uninfected	coactosin-like protein [OS=Mus musculus]	Q9CQI6	Cotl1
Low	Host uninfected	Cell division control protein 42 homolog [OS=Mus musculus]	P60766-2	Cdc42
Low	Host uninfected	Heterogeneous nuclear ribonucleoproteins C1/C2 [OS=Mus musculus]	Q9Z204	Hnrnpc
Low	Host uninfected	Microtubule-associated protein 4 [OS=Mus musculus]	P27546-1	Map4; Mtap4
Low	Host uninfected	Lamina-associated polypeptide 2, isoforms beta/delta/epsilon/gamma [OS=Mus musculus]	Q61029	Tmpo
Low	Host uninfected	Non-specific lipid-transfer protein [OS=Mus musculus]	P32020	Scp2
Low	Host uninfected	Heterogeneous nuclear ribonucleoprotein A1 [OS=Mus musculus]	P49312-1	Hnrnpa1
Low	Host uninfected	Glutathione S-transferase Mu 2 [OS=Mus musculus]	P15626	Gstm2
Low	Host uninfected	Glutathione S-transferase Mu 1 [OS=Mus musculus]	P10649	Gstm1
Low	Host uninfected	Tumor protein D54 [OS=Mus musculus]	Q9CYZ2	Tpd52l2
Low	Host uninfected	Isoform MLC3 of Myosin light chain 1/3, skeletal muscle isoform [OS=Mus musculus]	P05977-2	Myl1
Low	Host uninfected	GTP:AMP phosphotransferase AK3, mitochondrial [OS=Mus musculus]	Q9WTP7	Ak3
Low	Host uninfected	Insulin-like growth factor-binding protein 7 [OS=Mus musculus]	Q61581	Igfbp7
Low	Host uninfected	Carbonyl reductase [NADPH] 2 [OS=Mus musculus]	P08074	Cbr2
Low	Host uninfected	Myosin regulatory light chain 2, skeletal muscle isoform [OS=Mus musculus]	P97457	Mylpf
Low	Host uninfected	Acyl-coenzyme A thioesterase 2, mitochondrial [OS=Mus musculus]	Q9QYR9	Acot2
Low	Host uninfected	Isoform 2 of Collagen alpha-1(XVIII) chain [OS=Mus musculus]	P39061-1	Col18a1
Low	Host uninfected	ATP synthase subunit beta, mitochondrial [OS=Mus musculus]	P56480	Atp5b
Low	Host uninfected	Isoform 2 of LIM domain-binding protein 3 [OS=Mus musculus]	Q9JKS4-2	Ldb3
Low	Host uninfected	Histone H1.2 [OS=Mus musculus]	P15864	Hist1h1c
Low	Host uninfected	High mobility group protein B1 [OS=Mus musculus]	P63158	Hmgb1; Gm21596; LOC100862258
Low	Host uninfected	Hydroxyacyl-coenzyme A dehydrogenase, mitochondrial [OS=Mus musculus]	Q61425	Hadh
Low	Host uninfected	Aspartate aminotransferase, mitochondrial [OS=Mus musculus]	P05202	Got2
Low	Host uninfected	Superoxide dismutase [Cu-Zn] [OS=Mus musculus]	P08228	Sod1
Low	Host uninfected	LIM zinc-binding domain-containing Nebulette [OS=Mus musculus]	Q9DC07-1	Nebl
Low	Host uninfected	peptidyl-prolyl cis-trans isomerase C [OS=Mus musculus]	P30412	Ppic
Low	Host infected	lysozyme c-2 [OS=Mus musculus]	P08905	Lyz2
Low	Host infected	Annexin A2 [OS=Mus musculus]	P07356	Anxa2
Low	Host infected	peptidyl-prolyl cis-trans isomerase A [OS=Mus musculus]	P17742	Ppia
Low	Host infected	Chitinase-like protein 3 [OS=Mus musculus]	O35744	Chi3l3; Chil3
Low	Host infected	Hemoglobin subunit beta-1 [OS=Mus musculus]	P02088	Hbb-b1; Beta-s; Hbb-bs; Hbb-bt
Low	Host infected	annexin A1 [OS=Mus musculus]	P10107	Anxa1
Low	Host infected	profilin-1 [OS=Mus musculus]	P62962	Pfn1
Low	Host infected	Transgelin-2 [OS=Mus musculus]	Q9WVA4	Tagln2
Low	Host infected	Peptidyl-prolyl cis-trans isomerase FKBP2 [OS=Mus musculus]	P45878	Fkbp2
Low	Host infected	Hemoglobin subunit alpha [OS=Mus musculus]	P01942	Hba-a1; Hba-a2
Low	Host infected	Cytochrome c, somatic [OS=Mus musculus]	P62897	Cycs; Gm10053
Low	Host infected	Cathepsin B [OS=Mus musculus]	P10605	Ctsb
Low	Host infected	heterogeneous nuclear ribonucleoproteins A2/B1 [OS=Mus musculus]	O88569	Hnrnpa2b1
Low	Host infected	Hemoglobin subunit beta-2 [OS=Mus musculus]	P02089	Hbb-b2
Low	Host infected	Epididymal secretory protein E1 [OS=Mus musculus]	Q9Z0J0	Npc2
Low	Host infected	Malate dehydrogenase, mitochondrial [OS=Mus musculus]	P08249	Mdh2
Low	Host infected	Ubiquitin-60S ribosomal protein L40 [OS=Mus musculus]	P62984	Uba52; Gm11808
Low	Host infected	Carbonyl reductase [NADPH] 2 [OS=Mus musculus]	P08074	Cbr2
Low	Host infected	Ras suppressor protein 1 [OS=Mus musculus]	Q01730	Rsu1
Low	Host infected	flavin reductase (NADPH) [OS=Mus musculus]	Q923D2	Blvrb
Low	Host infected	Ubiquitin-60S ribosomal protein L40 OS=Pneumocystis murina (strain B123) OX=1069680 GN=PNEG_00053 PE=4 SV=1	M7NWD9	PNEG_00053
Low	Host infected	Cytochrome c oxidase subunit 6B1 [OS=Mus musculus]	P56391	Cox6b1
Low	Host infected	Protein disulfide-isomerase A3 [OS=Mus musculus]	P27773	Pdia3
Low	Host infected	Calmodulin [OS=Mus musculus]	P62204	Calm3; Calm1; Calm2
Low	Host infected	Periaxin [OS=Mus musculus]	O55103	Prx
Low	Host infected	cathepsin S [OS=Mus musculus]	O70370	Ctss
Low	Host infected	Peroxiredoxin-5, mitochondrial [OS=Mus musculus]	P99029	Prdx5
Low	Host infected	Mesencephalic astrocyte-derived neurotrophic factor [OS=Mus musculus]	Q9CXI5	Manf
Low	Host infected	annexin A4 [OS=Mus musculus]	P97429	Anxa4
Low	Host infected	Adenylate kinase 2, mitochondrial [OS=Mus musculus]	Q9WTP6-1	Ak2
Low	Host infected	coactosin-like protein [OS=Mus musculus]	Q9CQI6	Cotl1
Low	Host infected	adenylyl cyclase-associated protein 1 [OS=Mus musculus]	P40124	Cap1
Low	Host infected	Cofilin-1 [OS=Mus musculus]	P18760	Cfl1
Low	Host infected	rho GDP-dissociation inhibitor 1 [OS=Mus musculus]	Q99PT1	Arhgdia
Low	Host infected	peptidyl-prolyl cis-trans isomerase B [OS=Mus musculus]	P24369	Ppib
Low	Host infected	Protein disulfide-isomerase A6 [OS=Mus musculus]	Q922R8	Pdia6
Low	Host infected	annexin A5 [OS=Mus musculus]	P48036	Anxa5
Low	Host infected	Peptidyl-prolyl cis-trans isomerase OS=Pneumocystis murina (strain B123) OX=1069680 GN=PNEG_02449 PE=3 SV=1	M7P5E7	PNEG_02449
Low	Host infected	annexin A3 [OS=Mus musculus]	O35639	Anxa3
Low	Host infected	RNA-binding motif protein, X chromosome [OS=Mus musculus]	Q9WV02-1	Rbmx
Low	Host infected	ATP synthase subunit beta, mitochondrial [OS=Mus musculus]	P56480	Atp5b
Low	Host infected	advanced glycosylation end product-specific receptor [OS=Mus musculus]	Q62151	Ager
Low	Host infected	thiosulfate sulfurtransferase [OS=Mus musculus]	P52196	Tst
Low	Host infected	Mimecan [OS=Mus musculus]	Q62000	Ogn
Low	Host infected	40S ribosomal protein S12 [OS=Mus musculus]	P63323	Rps12
Low	Host infected	peptidoglycan recognition protein 1 [OS=Mus musculus]	O88593	Pglyrp1
Low	Host infected	Neutrophil elastase [OS=Mus musculus]	Q3UP87	Elane
Low	Host infected	Galectin-3-binding protein [OS=Mus musculus]	Q07797	Lgals3bp
Low	Host infected	Peroxiredoxin-2 [OS=Mus musculus]	Q61171	Prdx2
Low	Host infected	Cytochrome c OS=Pneumocystis murina (strain B123) OX=1069680 GN=PNEG_00557 PE=3 SV=1	M7PM51	PNEG_00557
Low	Host infected	Eukaryotic translation initiation factor 4H [OS=Mus musculus]	Q9WUK2-1	Eif4h
Low	Host infected	Pro-cathepsin H [OS=Mus musculus]	P49935	Ctsh
Low	Host infected	Galectin-1 [OS=Mus musculus]	P16045	Lgals1
Low	Host infected	Aspartate aminotransferase, mitochondrial [OS=Mus musculus]	P05202	Got2
Low	Host infected	Carbonic anhydrase 2 [OS=Mus musculus]	P00920	Car2
Low	Host infected	Thioredoxin OS=Pneumocystis murina (strain B123) OX=1069680 GN=PNEG_00288 PE=3 SV=1	M7NVF6	PNEG_00288
Low	Host infected	10 kDa heat shock protein, mitochondrial [OS=Mus musculus]	Q64433	Hspe1
Low	Host infected	Histidine triad nucleotide-binding protein 2, mitochondrial [OS=Mus musculus]	Q9D0S9	Hint2
Low	Host infected	Tubulin polymerization-promoting protein family member 3 [OS=Mus musculus]	Q9CRB6	Tppp3
Low	Host infected	ubiquitin-conjugating enzyme E2 N [OS=Mus musculus]	P61089	Ube2n
Low	Host infected	ras-related protein Rab-7a [OS=Mus musculus]	P51150	Rab7
Low	Host infected	coiled-coil domain-containing protein 58 [OS=Mus musculus]	Q8R3Q6	Ccdc58
Low	Host infected	60 kDa heat shock protein, mitochondrial [OS=Mus musculus]	P63038-1	Hspd1
Low	Host infected	Eosinophil cationic protein 2 [OS=Mus musculus]	P97425	Ear2
Low	Host infected	Ganglioside GM2 activator [OS=Mus musculus]	Q60648	Gm2a
Low	Host infected	Palmitoyl-protein thioesterase 1 [OS=Mus musculus]	O88531	Ppt1
Low	Host infected	Cathepsin D [OS=Mus musculus]	P18242	Ctsd
Low	Host infected	peptidyl-prolyl cis-trans isomerase C [OS=Mus musculus]	P30412	Ppic
Low	Host infected	GTP:AMP phosphotransferase AK3, mitochondrial [OS=Mus musculus]	Q9WTP7	Ak3
Low	Host infected	Protein canopy homolog 2 [OS=Mus musculus]	Q9QXT0	Cnpy2
Low	Host infected	Heterogeneous nuclear ribonucleoproteins C1/C2 [OS=Mus musculus]	Q9Z204	Hnrnpc
Low	Host infected	Protein S100-A8 [OS=Mus musculus]	P27005	S100a8
Low	Host infected	Acidic mammalian chitinase [OS=Mus musculus]	Q91XA9	Chia; Chia1
Low	Host infected	Insulin-like growth factor-binding protein 7 [OS=Mus musculus]	Q61581	Igfbp7
Low	Host infected	40S ribosomal protein S28 [OS=Mus musculus]	P62858	Rps28
Low	Host infected	Ribosome-binding protein 1 [OS=Mus musculus]	Q99PL5-1	Rrbp1
Low	Host infected	60S acidic ribosomal protein P2 [OS=Mus musculus]	P99027	Rplp2
Low	Host infected	Enoyl-[acyl-carrier-protein] reductase, mitochondrial [OS=Mus musculus]	Q9DCS3	Mecr
Low	Host infected	Superoxide dismutase [Mn], mitochondrial [OS=Mus musculus]	P09671	Sod2
Low	Host infected	Protein S100-A9 [OS=Mus musculus]	P31725	S100a9
Low	Host infected	Protein S100-A10 [OS=Mus musculus]	P08207	S100a10
Low	Host infected	Neutrophil gelatinase-associated lipocalin [OS=Mus musculus]	P11672	Lcn2
Low	Host infected	Fatty acid-binding protein, epidermal [OS=Mus musculus]	Q05816	Fabp5
Low	Host infected	Heat shock cognate 71 kDa protein [OS=Mus musculus]	P63017	Hspa8
Low	Host infected	Cathepsin Z [OS=Mus musculus]	Q9WUU7	Ctsz
Low	Host infected	THO complex subunit 4 [OS=Mus musculus]	O08583-1	Alyref
Low	Host infected	ATP synthase subunit beta OS=Pneumocystis murina (strain B123) OX=1069680 GN=PNEG_00966 PE=3 SV=1	M7PK55	PNEG_00966
Low	Host infected	Lamina-associated polypeptide 2, isoforms beta/delta/epsilon/gamma [OS=Mus musculus]	Q61029	Tmpo
Low	Host infected	Uncharacterized protein OS=Pneumocystis murina (strain B123) OX=1069680 GN=PNEG_03614 PE=4 SV=1	M7NM54	PNEG_03614
Low	Host infected	Spectrin beta chain, non-erythrocytic 1 [OS=Mus musculus]	Q62261-1	Spnb2; Sptbn1
Low	Host infected	alpha-enolase [OS=Mus musculus]	P17182	Eno1; Gm5506; Eno1b
Low	Host infected	Heterogeneous nuclear ribonucleoprotein F [OS=Mus musculus]	Q9Z2X1-1	Hnrnpf
Low	Host infected	Non-specific lipid-transfer protein [OS=Mus musculus]	P32020	Scp2
Low	Host infected	40S ribosomal protein SA [OS=Mus musculus]	P14206	Rpsa; LOC100045332; LOC100505031; LOC102642689
Low	Host infected	Coiled-coil-helix-coiled-coil-helix domain-containing protein 2 [OS=Mus musculus]	Q9D1L0	Chchd2
Low	Host infected	Myosin light polypeptide 6 [OS=Mus musculus]	Q60605	Myl6
Low	Host infected	Ras-related protein Rap-1b [OS=Mus musculus]	Q99JI6	Rap1b
Low	Host infected	Extended synaptotagmin-1 [OS=Mus musculus]	Q3U7R1	Esyt1
Low	Host infected	Microtubule-associated protein 4 [OS=Mus musculus]	P27546-1	Map4; Mtap4
Low	Host infected	Cytochrome b-c1 complex subunit 6, mitochondrial [OS=Mus musculus]	P99028	Uqcrh
Low	Host infected	Uncharacterized protein OS=Pneumocystis murina (strain B123) OX=1069680 GN=PNEG_03434 PE=4 SV=1	M7PCV6	PNEG_03434
Low	Host infected	Apolipoprotein A-I [OS=Mus musculus]	Q00623	Apoa1
Low	Host infected	Hydroxyacyl-coenzyme A dehydrogenase, mitochondrial [OS=Mus musculus]	Q61425	Hadh
Low	Host infected	Heterogeneous nuclear ribonucleoprotein K [OS=Mus musculus]	P61979	Hnrnpk
Low	Host infected	3-mercaptopyruvate sulfurtransferase [OS=Mus musculus]	Q99J99	Mpst
Low	Host infected	Protein disulfide-isomerase domain OS=Pneumocystis murina (strain B123) OX=1069680 GN=PNEG_01591 PE=4 SV=1	M7P925	PNEG_01591
Low	Host infected	Eosinophil cationic protein 1 [OS=Mus musculus]	P97426	Ear1; LOC101056653
Low	Host infected	Ubiquitin-conjugating enzyme E2 L3 [OS=Mus musculus]	P68037	Ube2l3; Gm10705
Low	Host infected	Heterogeneous nuclear ribonucleoprotein A1 [OS=Mus musculus]	P49312-1	Hnrnpa1
Low	Host infected	Ras-related protein Rab-14 [OS=Mus musculus]	Q91V41	Rab14
Low	Host infected	Acid ceramidase [OS=Mus musculus]	Q9WV54	Asah1
Low	Host infected	Magnesium-dependent phosphatase 1 [OS=Mus musculus]	Q9D967	Mdp1
Low	Host infected	Succinate--CoA ligase [ADP/GDP-forming] subunit alpha, mitochondrial [OS=Mus musculus]	Q9WUM5	Suclg1
Low	Host infected	Leucine-rich repeat-containing protein 59 [OS=Mus musculus]	Q922Q8	Lrrc59
Low	Host infected	RNA-binding protein Raly [OS=Mus musculus]	Q64012	Raly
Low	Host infected	Lysozyme c-1 [OS=Mus musculus]	P17897	Lyz1
Low	Host infected	Heterogeneous nuclear ribonucleoprotein A3 [OS=Mus musculus]	Q8BG05	Hnrnpa3
Low	Host infected	alpha-2-macroglobulin receptor-associated protein [OS=Mus musculus]	P55302	Lrpap1
Low	Host infected	mitochondrial fission 1 protein [OS=Mus musculus]	Q9CQ92	Fis1
Low	Host infected	3-hydroxyacyl-CoA dehydrogenase type-2 [OS=Mus musculus]	O08756	Hsd17b10
Low	Host infected	Arginase-1 [OS=Mus musculus]	Q61176	Arg1
Low	Host infected	Thioredoxin, mitochondrial [OS=Mus musculus]	P97493	Txn2
Low	Host infected	Endoplasmic reticulum resident protein 29 [OS=Mus musculus]	P57759	Erp29
Low	Host infected	Prosaposin [OS=Mus musculus]	Q61207	Psap
Low	Host infected	Histone H1.2 [OS=Mus musculus]	P15864	Hist1h1c
Low	Host infected	Chitinase-3-like protein 1 [OS=Mus musculus]	Q61362-1	Chi3l1; Chil1
Low	Host infected	Enhancer of rudimentary homolog [OS=Mus musculus]	P84089	Erh
Low	Host infected	tropomodulin-3 [OS=Mus musculus]	Q9JHJ0	Tmod3
Low	Host infected	Prelamin-A/C [OS=Mus musculus]	P48678-1	Lmna
Low	Host infected	Adapter molecule crk [OS=Mus musculus]	Q64010-1	Crk
Low	Host infected	Cold-inducible RNA-binding protein [OS=Mus musculus]	P60824	Cirbp
Low	Host infected	Glutaredoxin-1 [OS=Mus musculus]	Q9QUH0	Glrx
Low	Host infected	Phosphatidylinositol-binding clathrin assembly protein [OS=Mus musculus]	Q7M6Y3-1	Picalm
Low	Host infected	Peptidyl-prolyl cis-trans isomerase OS=Pneumocystis murina (strain B123) OX=1069680 GN=PNEG_02855 PE=3 SV=1	M7NJ81	PNEG_02855
Low	Host infected	Uteroglobin [OS=Mus musculus]	Q06318	Scgb1a1
Low	Host infected	isochorismatase domain-containing protein 2A [OS=Mus musculus]	P85094	Isoc2a
Low	Host infected	Thioredoxin-dependent peroxide reductase, mitochondrial [OS=Mus musculus]	P20108	Prdx3
Low	Host infected	eukaryotic translation initiation factor 1 [OS=Mus musculus]	P48024	Eif1
Low	Host infected	Superoxide dismutase [Cu-Zn] [OS=Mus musculus]	P08228	Sod1
Low	Host infected	Actin-related protein 2/3 complex subunit 5 [OS=Mus musculus]	Q9CPW4	Arpc5
Low	Host infected	RNA-binding protein 3 [OS=Mus musculus]	O89086	Rbm3
Low	Host infected	Resistin-like alpha [OS=Mus musculus]	Q9EP95	Retnla
Low	Host infected	Drebrin-like protein [OS=Mus musculus]	Q62418	Dbnl
Low	Host infected	Protein S100-A13 [OS=Mus musculus]	P97352	S100a13
Low	Host infected	peroxisomal multifunctional enzyme type 2 [OS=Mus musculus]	P51660	Hsd17b4
Low	Host infected	Isoform 2 of Collagen alpha-1(XVIII) chain [OS=Mus musculus]	P39061-1	Col18a1
Low	Host infected	Acyl-coenzyme A thioesterase 2, mitochondrial [OS=Mus musculus]	Q9QYR9	Acot2
Low	Host infected	Allograft inflammatory factor 1 [OS=Mus musculus]	O70200	Aif1
Low	Host infected	annexin A6 [OS=Mus musculus]	P14824	Anxa6
Low	Pathogen and host	lysozyme c-2 [OS=Mus musculus]	P08905	Lyz2
Low	Pathogen and host	Hemoglobin subunit beta-1 [OS=Mus musculus]	P02088	Hbb-b1; Beta-s; Hbb-bs; Hbb-bt
Low	Pathogen and host	Ubiquitin-60S ribosomal protein L40 OS=Pneumocystis murina (strain B123) OX=1069680 GN=PNEG_00053 PE=4 SV=1	M7NWD9	PNEG_00053
Low	Pathogen and host	Hemoglobin subunit alpha [OS=Mus musculus]	P01942	Hba-a1; Hba-a2
Low	Pathogen and host	peptidyl-prolyl cis-trans isomerase A [OS=Mus musculus]	P17742	Ppia
Low	Pathogen and host	Hemoglobin subunit beta-2 [OS=Mus musculus]	P02089	Hbb-b2
Low	Pathogen and host	Annexin A2 [OS=Mus musculus]	P07356	Anxa2
Low	Pathogen and host	annexin A1 [OS=Mus musculus]	P10107	Anxa1
Low	Pathogen and host	flavin reductase (NADPH) [OS=Mus musculus]	Q923D2	Blvrb
Low	Pathogen and host	Transgelin-2 [OS=Mus musculus]	Q9WVA4	Tagln2
Low	Pathogen and host	profilin-1 [OS=Mus musculus]	P62962	Pfn1
Low	Pathogen and host	Ubiquitin-60S ribosomal protein L40 [OS=Mus musculus]	P62984	Uba52; Gm11808
Low	Pathogen and host	Chitinase-like protein 3 [OS=Mus musculus]	O35744	Chi3l3; Chil3
Low	Pathogen and host	Peptidyl-prolyl cis-trans isomerase OS=Pneumocystis murina (strain B123) OX=1069680 GN=PNEG_02449 PE=3 SV=1	M7P5E7	PNEG_02449
Low	Pathogen and host	Cathepsin B [OS=Mus musculus]	P10605	Ctsb
Low	Pathogen and host	Thioredoxin OS=Pneumocystis murina (strain B123) OX=1069680 GN=PNEG_00288 PE=3 SV=1	M7NVF6	PNEG_00288
Low	Pathogen and host	Peroxiredoxin-2 [OS=Mus musculus]	Q61171	Prdx2
Low	Pathogen and host	Cofilin-1 [OS=Mus musculus]	P18760	Cfl1
Low	Pathogen and host	Cytochrome c OS=Pneumocystis murina (strain B123) OX=1069680 GN=PNEG_00557 PE=3 SV=1	M7PM51	PNEG_00557
Low	Pathogen and host	Cytochrome c, somatic [OS=Mus musculus]	P62897	Cycs; Gm10053
Low	Pathogen and host	coactosin-like protein [OS=Mus musculus]	Q9CQI6	Cotl1
Low	Pathogen and host	Malate dehydrogenase, mitochondrial [OS=Mus musculus]	P08249	Mdh2
Low	Pathogen and host	peptidyl-prolyl cis-trans isomerase B [OS=Mus musculus]	P24369	Ppib
Low	Pathogen and host	Peptidyl-prolyl cis-trans isomerase FKBP2 [OS=Mus musculus]	P45878	Fkbp2
Low	Pathogen and host	annexin A4 [OS=Mus musculus]	P97429	Anxa4
Low	Pathogen and host	cathepsin S [OS=Mus musculus]	O70370	Ctss
Low	Pathogen and host	Protein disulfide-isomerase domain OS=Pneumocystis murina (strain B123) OX=1069680 GN=PNEG_01591 PE=4 SV=1	M7P925	PNEG_01591
Low	Pathogen and host	Cytochrome c oxidase subunit 6B1 [OS=Mus musculus]	P56391	Cox6b1
Low	Pathogen and host	Protein S100-A8 [OS=Mus musculus]	P27005	S100a8
Low	Pathogen and host	Epididymal secretory protein E1 [OS=Mus musculus]	Q9Z0J0	Npc2
Low	Pathogen and host	ubiquitin-conjugating enzyme E2 N [OS=Mus musculus]	P61089	Ube2n
Low	Pathogen and host	heterogeneous nuclear ribonucleoproteins A2/B1 [OS=Mus musculus]	O88569	Hnrnpa2b1
Low	Pathogen and host	Mesencephalic astrocyte-derived neurotrophic factor [OS=Mus musculus]	Q9CXI5	Manf
Low	Pathogen and host	peptidoglycan recognition protein 1 [OS=Mus musculus]	O88593	Pglyrp1
Low	Pathogen and host	Peroxiredoxin-5, mitochondrial [OS=Mus musculus]	P99029	Prdx5
Low	Pathogen and host	Neutrophil elastase [OS=Mus musculus]	Q3UP87	Elane
Low	Pathogen and host	Peptidyl-prolyl cis-trans isomerase OS=Pneumocystis murina (strain B123) OX=1069680 GN=PNEG_02855 PE=3 SV=1	M7NJ81	PNEG_02855
Low	Pathogen and host	Calmodulin [OS=Mus musculus]	P62204	Calm3; Calm1; Calm2
Low	Pathogen and host	Ras suppressor protein 1 [OS=Mus musculus]	Q01730	Rsu1
Low	Pathogen and host	alpha-enolase [OS=Mus musculus]	P17182	Eno1; Gm5506; Eno1b
Low	Pathogen and host	adenylyl cyclase-associated protein 1 [OS=Mus musculus]	P40124	Cap1
Low	Pathogen and host	Eukaryotic translation initiation factor 5A OS=Pneumocystis murina (strain B123) OX=1069680 GN=PNEG_00617 PE=3 SV=1	M7NUN2	PNEG_00617
Low	Pathogen and host	Fatty acid-binding protein, epidermal [OS=Mus musculus]	Q05816	Fabp5
Low	Pathogen and host	Heterogeneous nuclear ribonucleoproteins C1/C2 [OS=Mus musculus]	Q9Z204	Hnrnpc
Low	Pathogen and host	Pro-cathepsin H [OS=Mus musculus]	P49935	Ctsh
Low	Pathogen and host	rho GDP-dissociation inhibitor 1 [OS=Mus musculus]	Q99PT1	Arhgdia
Low	Pathogen and host	Protein S100-A9 [OS=Mus musculus]	P31725	S100a9
Low	Pathogen and host	Ganglioside GM2 activator [OS=Mus musculus]	Q60648	Gm2a
Low	Pathogen and host	Adenylate kinase 2, mitochondrial [OS=Mus musculus]	Q9WTP6-1	Ak2
Low	Pathogen and host	Galectin-1 [OS=Mus musculus]	P16045	Lgals1
Low	Pathogen and host	Aldo_ket_red domain-containing protein OS=Pneumocystis murina (strain B123) OX=1069680 GN=PNEG_04328 PE=4 SV=1	A0A0W4ZWW3	PNEG_02367; PNEG_04328
Low	Pathogen and host	Tubulin polymerization-promoting protein family member 3 [OS=Mus musculus]	Q9CRB6	Tppp3
Low	Pathogen and host	annexin A5 [OS=Mus musculus]	P48036	Anxa5
Low	Pathogen and host	eukaryotic translation initiation factor 4B [OS=Mus musculus]	Q8BGD9	Eif4b
Low	Pathogen and host	Malate dehydrogenase OS=Pneumocystis murina (strain B123) OX=1069680 GN=PNEG_02625 PE=3 SV=1	M7NJQ3	PNEG_02625
Low	Pathogen and host	Heterogeneous nuclear ribonucleoprotein A3 [OS=Mus musculus]	Q8BG05	Hnrnpa3
Low	Pathogen and host	RNA-binding protein 3 [OS=Mus musculus]	O89086	Rbm3
Low	Pathogen and host	Eukaryotic translation initiation factor 5A-1 [OS=Mus musculus]	P63242	Eif5a
Low	Pathogen and host	ADF-H domain-containing protein OS=Pneumocystis murina (strain B123) OX=1069680 GN=PNEG_02593 PE=3 SV=1	M7PFP3	PNEG_02593
Low	Pathogen and host	Cathepsin Z [OS=Mus musculus]	Q9WUU7	Ctsz
Low	Pathogen and host	Prosaposin [OS=Mus musculus]	Q61207	Psap
Low	Pathogen and host	Protein disulfide-isomerase A3 [OS=Mus musculus]	P27773	Pdia3
Low	Pathogen and host	thiosulfate sulfurtransferase [OS=Mus musculus]	P52196	Tst
Low	Pathogen and host	Eosinophil cationic protein 1 [OS=Mus musculus]	P97426	Ear1; LOC101056653
Low	Pathogen and host	Heterogeneous nuclear ribonucleoprotein F [OS=Mus musculus]	Q9Z2X1-1	Hnrnpf
Low	Pathogen and host	40S ribosomal protein SA [OS=Mus musculus]	P14206	Rpsa; LOC100045332; LOC100505031; LOC102642689
Low	Pathogen and host	Succinate--CoA ligase [ADP/GDP-forming] subunit alpha, mitochondrial [OS=Mus musculus]	Q9WUM5	Suclg1
Low	Pathogen and host	ATP synthase subunit beta, mitochondrial [OS=Mus musculus]	P56480	Atp5b
Low	Pathogen and host	ATP synthase subunit beta OS=Pneumocystis murina (strain B123) OX=1069680 GN=PNEG_00966 PE=3 SV=1	M7PK55	PNEG_00966
Low	Pathogen and host	Glyceraldehyde-3-phosphate dehydrogenase OS=Pneumocystis murina (strain B123) OX=1069680 GN=PNEG_01876 PE=3 SV=1	M7PGV1	PNEG_01876
